# Supplementary material for: Lactobacillus plantarum TWK10 Attenuates Aging-Associated Muscle Weakness, Bone Loss, and Cognitive Impairment by Modulating the Gut Microbiome in Mice
Source: Front Nutr. 2021 Oct 13;8:708096. doi: 10.3389/fnut.2021.708096 (PMC8548577; doi:10.3389/fnut.2021.708096)
Supplement: Supplementary file 1 [file Table_1.XLSX]

## Sheet: Table S1_OTU table
Supplementary Table S1. Operational taxonomic units identified in fecal samples from young and aged mice after eight weeks of administration
Group	A-Control	A-Control	A-Control	A-Control	A-Control	A-Control	A-Control	A-Control	A-Control	A-Control	A-Control	A-TWK10	A-TWK10	A-TWK10	A-TWK10	A-TWK10	A-TWK10	A-TWK10	A-TWK10	A-TWK10	Y-Control	Y-Control	Y-Control	Y-Control	Y-Control	Y-Control	Y-Control	Y-Control	Y-TWK10	Y-TWK10	Y-TWK10	Y-TWK10	Y-TWK10	Y-TWK10	Y-TWK10	Y-TWK10	Y-TWK10
taxonomy	A.AP1	A.AP10	A.AP11	A.AP2	A.AP3	A.AP4	A.AP5	A.AP6	A.AP7	A.AP8	A.AP9	A.AT1	A.AT2	A.AT3	A.AT4	A.AT5	A.AT6	A.AT7	A.AT8	A.AT9	A.YP1	A.YP2	A.YP3	A.YP4	A.YP5	A.YP6	A.YP7	A.YP8	A.YT1	A.YT2	A.YT3	A.YT4	A.YT5	A.YT6	A.YT7	A.YT8	A.YT9
Unassigned;;;;;;;	0	3	0	4	0	3	3	0	0	0	0	3	13	0	2	0	7	0	4	0	4	0	5	10	5	2	0	0	0	13	8	0	3	0	5	3	9
k_Bacteria;;;;;;;	0	0	0	0	2	0	2	0	0	0	0	0	5	0	0	0	0	0	0	0	0	0	0	0	4	0	7	3	10	0	0	9	0	0	7	0	0
k_Bacteria;p_Acidobacteria;c_Acidobacteriia;o_Solibacterales;f_Solibacteraceae ;g_Candidatus Solibacter;;	0	0	0	0	0	0	0	0	0	0	0	0	0	0	0	0	2	0	0	0	0	0	0	0	0	0	0	0	0	0	0	0	0	0	0	0	0
k_Bacteria;p_Acidobacteria;c_Acidobacteriia;o_Subgroup 2;;;;	0	0	0	0	0	0	0	0	0	0	0	0	0	0	0	0	0	0	0	0	0	0	0	0	0	0	0	0	0	0	0	0	0	0	0	0	0
k_Bacteria;p_Acidobacteria;c_Blastocatellia ;o_Pyrinomonadales;f_Pyrinomonadaceae;g_RB41;;	0	0	3	0	0	0	0	0	0	0	0	0	0	0	0	0	0	0	0	0	0	0	0	0	0	0	0	0	0	0	0	0	0	0	0	0	0
k_Bacteria;p_Acidobacteria;c_Thermoanaerobaculia;o_Thermoanaerobaculales;f_Thermoanaerobaculaceae;g_TPD-58;s_uncultured bacterium;	0	0	0	0	0	0	0	0	0	0	0	0	0	0	0	0	0	0	0	0	0	0	2	0	0	0	0	0	0	0	0	0	0	0	0	0	0
k_Bacteria;p_Actinobacteria;c_Actinobacteria;o_Actinomycetales;f_Actinomycetaceae;g_Actinobaculum;s_Actinobaculum massiliense ACS-171-V-Col2;	0	0	0	0	0	0	0	0	0	0	0	0	0	0	0	0	0	0	0	0	0	0	0	0	0	0	0	0	0	0	0	0	0	0	0	0	0
k_Bacteria;p_Actinobacteria;c_Actinobacteria;o_Actinomycetales;f_Actinomycetaceae;g_Mobiluncus;;	0	0	0	0	0	0	0	0	0	0	0	0	0	0	0	0	0	0	0	0	0	0	0	0	0	0	0	0	0	0	0	0	0	0	0	0	0
k_Bacteria;p_Actinobacteria;c_Actinobacteria;o_Actinomycetales;f_Actinomycetaceae;g_Mobiluncus;s_Mobiluncus curtisii;	0	0	0	0	0	0	0	0	0	0	0	0	0	0	0	0	0	0	0	0	0	0	0	0	0	0	0	0	0	0	0	0	0	0	0	0	0
k_Bacteria;p_Actinobacteria;c_Actinobacteria;o_Bifidobacteriales;f_Bifidobacteriaceae;g_Bifidobacterium;;	0	0	161	0	0	10	0	146	10	250	1845	0	0	0	0	15	3	0	0	0	0	0	0	0	0	0	0	0	0	0	0	0	0	0	0	0	0
k_Bacteria;p_Actinobacteria;c_Actinobacteria;o_Bifidobacteriales;f_Bifidobacteriaceae;g_Bifidobacterium;s_Bifidobacterium breve;	0	0	0	0	0	0	0	0	0	0	0	0	0	0	0	0	0	0	0	0	0	0	0	0	0	0	0	0	0	0	0	0	0	0	0	0	0
k_Bacteria;p_Actinobacteria;c_Actinobacteria;o_Bifidobacteriales;f_Bifidobacteriaceae;g_Bifidobacterium;s_Bifidobacterium longum subsp. longum;	0	0	0	0	0	0	0	0	0	0	0	0	0	0	0	0	0	0	0	0	0	0	0	0	0	0	0	0	0	0	0	0	0	0	0	0	0
k_Bacteria;p_Actinobacteria;c_Actinobacteria;o_Corynebacteriales;f_Corynebacteriaceae;g_Corynebacterium 1;;	0	0	0	0	0	0	0	0	0	0	0	0	0	0	0	0	0	0	0	0	0	0	0	0	0	0	0	0	0	0	0	0	0	0	0	0	0
k_Bacteria;p_Actinobacteria;c_Actinobacteria;o_Corynebacteriales;f_Corynebacteriaceae;g_Corynebacterium 1;s_Corynebacterium kroppenstedtii;	0	0	0	0	0	0	0	0	0	0	0	0	0	0	0	0	0	0	0	0	0	0	0	0	0	0	0	0	0	0	0	0	0	0	0	0	0
k_Bacteria;p_Actinobacteria;c_Actinobacteria;o_Corynebacteriales;f_Corynebacteriaceae;g_Corynebacterium 1;s_Corynebacterium stationis;	9	0	0	0	0	0	5	4	0	0	0	19	3	0	0	0	0	0	29	0	0	0	0	0	0	0	0	0	0	0	0	0	0	0	0	0	0
k_Bacteria;p_Actinobacteria;c_Actinobacteria;o_Corynebacteriales;f_Corynebacteriaceae;g_Corynebacterium sp. NML 100378;s_Corynebacterium sp. NML 100378;	0	0	0	0	0	0	0	0	0	0	0	0	0	0	0	0	0	0	0	0	0	0	0	0	0	0	0	0	0	0	0	0	0	0	0	0	0
k_Bacteria;p_Actinobacteria;c_Actinobacteria;o_Corynebacteriales;f_Corynebacteriaceae;g_Corynebacterium;;	0	0	0	0	0	0	0	0	0	0	0	0	0	0	0	0	0	0	0	0	0	0	0	0	0	0	0	0	4	0	0	0	0	0	0	0	0
k_Bacteria;p_Actinobacteria;c_Actinobacteria;o_Corynebacteriales;f_Corynebacteriaceae;g_Corynebacterium;s_Corynebacterium pyruviciproducens ATCC BAA-1742;	0	0	0	0	0	0	0	0	0	0	0	0	0	0	0	0	0	0	0	0	0	0	0	0	0	0	0	0	0	0	0	0	0	0	0	0	0
k_Bacteria;p_Actinobacteria;c_Actinobacteria;o_Corynebacteriales;f_Corynebacteriaceae;g_Lawsonella;s_uncultured bacterium;	0	0	0	0	0	0	0	0	0	0	0	0	0	0	0	0	0	0	0	0	0	0	0	0	0	0	0	0	0	0	0	0	0	0	0	0	0
k_Bacteria;p_Actinobacteria;c_Actinobacteria;o_Corynebacteriales;f_Dietziaceae;g_Dietzia;;	0	0	0	0	0	0	0	0	0	0	0	0	0	7	0	0	0	0	0	0	0	0	3	0	0	0	0	0	0	0	0	0	0	0	0	0	0
k_Bacteria;p_Actinobacteria;c_Actinobacteria;o_Corynebacteriales;f_Mycobacteriaceae;g_Mycobacterium;;	0	0	0	0	0	0	0	0	0	2	0	0	0	0	0	0	0	0	0	0	0	0	0	0	0	0	0	0	11	0	5	0	0	8	0	3	3
k_Bacteria;p_Actinobacteria;c_Actinobacteria;o_Corynebacteriales;f_Nocardiaceae;g_Rhodococcus;;	0	0	0	0	0	0	0	0	0	0	0	0	0	0	0	0	0	0	0	0	0	0	0	0	0	0	0	0	0	4	0	0	0	2	0	0	0
k_Bacteria;p_Actinobacteria;c_Actinobacteria;o_Corynebacteriales;f_Nocardiaceae;g_Williamsia;;	0	0	0	0	0	0	0	0	0	0	0	0	0	0	0	0	0	0	0	0	0	0	0	0	0	0	0	0	0	0	0	0	0	0	11	0	0
k_Bacteria;p_Actinobacteria;c_Actinobacteria;o_Kineosporiales;f_Kineosporiaceae;;;	0	0	0	0	0	0	0	0	0	0	0	0	0	0	0	0	0	0	0	0	0	0	0	0	0	0	0	0	0	0	0	0	0	0	0	0	0
k_Bacteria;p_Actinobacteria;c_Actinobacteria;o_Micrococcales;f_Dermabacteraceae;g_Brachybacterium;;	0	0	0	0	0	0	0	0	0	0	0	0	0	0	0	0	0	0	0	0	0	3	0	0	0	0	0	0	0	2	0	0	0	0	0	0	0
k_Bacteria;p_Actinobacteria;c_Actinobacteria;o_Micrococcales;f_Dermabacteraceae;g_Dermabacter;s_uncultured bacterium;	0	0	0	0	0	0	0	0	0	0	0	0	0	0	0	0	0	0	0	0	0	0	0	0	0	0	0	0	0	0	0	0	0	0	0	0	0
k_Bacteria;p_Actinobacteria;c_Actinobacteria;o_Micrococcales;f_Intrasporangiaceae;;;	0	0	0	0	0	0	0	0	0	0	0	0	0	5	0	0	0	0	0	0	0	0	16	0	0	0	0	0	0	0	0	0	0	0	0	0	0
k_Bacteria;p_Actinobacteria;c_Actinobacteria;o_Micrococcales;f_Intrasporangiaceae;g_Ornithinimicrobium;;	0	0	0	2	0	0	0	0	0	0	0	0	0	0	0	0	0	0	0	0	0	0	0	0	0	0	0	0	0	0	0	0	0	0	0	0	0
k_Bacteria;p_Actinobacteria;c_Actinobacteria;o_Micrococcales;f_Microbacteriaceae;;;	0	0	0	0	0	0	0	0	0	0	0	0	0	0	0	0	0	0	0	0	0	4	0	0	0	0	0	0	5	0	0	0	0	0	12	0	0
k_Bacteria;p_Actinobacteria;c_Actinobacteria;o_Micrococcales;f_Microbacteriaceae;g_Aurantimicrobium;;	0	0	0	0	0	0	0	0	0	0	0	0	0	0	0	0	0	0	0	0	0	0	5	10	0	0	0	0	0	0	0	0	0	0	0	0	0
k_Bacteria;p_Actinobacteria;c_Actinobacteria;o_Micrococcales;f_Microbacteriaceae;g_Microbacterium;;	0	0	0	0	0	0	0	0	0	0	0	0	0	0	0	0	0	0	0	0	0	0	0	0	0	0	0	0	0	0	0	0	0	0	0	0	0
k_Bacteria;p_Actinobacteria;c_Actinobacteria;o_Micrococcales;f_Micrococcaceae;g_Kocuria;;	0	0	0	0	0	0	0	0	0	0	0	4	0	0	0	0	0	0	0	0	0	0	17	0	0	0	0	0	0	0	0	0	0	0	0	0	0
k_Bacteria;p_Actinobacteria;c_Actinobacteria;o_Micrococcales;f_Micrococcaceae;g_Micrococcus;;	0	0	0	0	0	0	0	0	0	0	0	0	0	0	0	0	0	0	0	0	0	0	0	0	0	0	0	0	0	0	0	0	0	0	0	0	0
k_Bacteria;p_Actinobacteria;c_Actinobacteria;o_Micrococcales;f_Micrococcaceae;g_Rothia;;	0	0	0	0	0	0	0	0	0	0	0	5	0	0	0	0	0	0	0	0	0	2	0	0	0	0	0	0	0	3	0	0	0	0	50	11	19
k_Bacteria;p_Actinobacteria;c_Actinobacteria;o_Micromonosporales;f_Micromonosporaceae;;;	0	0	0	0	0	0	0	0	0	0	0	0	0	0	0	0	0	0	0	0	0	0	0	0	0	0	0	5	0	0	0	0	0	0	0	0	23
k_Bacteria;p_Actinobacteria;c_Actinobacteria;o_Propionibacteriales;f_Propionibacteriaceae;g_Cutibacterium;;	0	0	0	0	0	0	0	0	0	0	0	0	0	0	0	0	0	0	0	0	0	0	0	0	0	0	2	0	6	3	0	0	0	6	3	0	0
k_Bacteria;p_Actinobacteria;c_Coriobacteriia;o_Coriobacteriales;f_Atopobiaceae;;;	0	0	0	2	0	0	0	0	0	0	0	0	0	0	0	0	0	0	0	0	0	0	0	0	0	0	0	0	0	0	0	0	0	0	0	0	0
k_Bacteria;p_Actinobacteria;c_Coriobacteriia;o_Coriobacteriales;f_Atopobiaceae;g_Atopobium;;	0	0	0	0	0	0	0	0	0	0	0	0	0	0	0	0	0	0	0	0	0	0	0	0	0	0	0	0	0	0	0	0	0	0	0	0	0
k_Bacteria;p_Actinobacteria;c_Coriobacteriia;o_Coriobacteriales;f_Atopobiaceae;g_Atopobium;s_Atopobium sp. oral taxon 810 str. F0209;	0	0	0	0	0	0	0	0	0	0	0	0	0	0	0	0	0	0	0	0	0	0	0	0	0	0	0	0	0	0	0	0	0	0	0	0	0
k_Bacteria;p_Actinobacteria;c_Coriobacteriia;o_Coriobacteriales;f_Atopobiaceae;g_Olsenella;;	0	0	0	0	0	0	0	0	0	0	0	0	0	0	0	0	0	0	0	0	0	0	0	0	0	0	0	0	0	0	0	0	0	0	0	0	0
k_Bacteria;p_Actinobacteria;c_Coriobacteriia;o_Coriobacteriales;f_Coriobacteriaceae;g_Collinsella;;	0	0	0	0	0	0	0	0	0	0	0	0	0	0	0	0	0	0	0	0	0	0	0	0	0	0	0	0	0	0	0	0	0	0	0	0	0
k_Bacteria;p_Actinobacteria;c_Coriobacteriia;o_Coriobacteriales;f_Coriobacteriales Incertae Sedis;g_uncultured;s_gut metagenome;	0	0	0	0	6	32	14	20	20	22	7	0	0	0	69	0	0	14	0	0	0	0	0	0	0	0	0	0	0	0	0	0	0	0	0	0	0
k_Bacteria;p_Actinobacteria;c_Coriobacteriia;o_Coriobacteriales;f_Eggerthellaceae;;;	19	35	0	0	24	273	36	38	41	19	21	0	395	0	34	5	9	6	4	16	0	54	0	25	11	68	13	75	0	0	0	24	0	13	6	0	0
k_Bacteria;p_Actinobacteria;c_Coriobacteriia;o_Coriobacteriales;f_Eggerthellaceae;g_Adlercreutzia;s_uncultured bacterium;	0	0	0	0	0	0	0	0	0	0	0	0	0	0	0	0	0	0	0	0	0	0	0	0	0	0	0	0	0	0	0	0	0	0	0	0	0
k_Bacteria;p_Actinobacteria;c_Coriobacteriia;o_Coriobacteriales;f_Eggerthellaceae;g_DNF00809;s_uncultured bacterium;	0	0	0	0	0	0	0	0	0	6	0	0	12	0	6	8	0	66	11	8	0	0	9	0	0	13	0	16	0	7	10	15	25	33	29	21	27
k_Bacteria;p_Actinobacteria;c_Coriobacteriia;o_Coriobacteriales;f_Eggerthellaceae;g_Enterorhabdus;;	258	233	230	177	57	214	113	46	197	174	159	465	321	178	217	184	170	81	192	371	115	272	668	353	189	609	316	583	1320	538	551	268	277	620	481	297	481
k_Bacteria;p_Actinobacteria;c_Coriobacteriia;o_Coriobacteriales;f_Eggerthellaceae;g_Enterorhabdus;s_Enterorhabdus caecimuris B7;	0	0	0	0	0	0	0	0	0	0	0	0	0	0	0	0	0	0	0	0	0	0	0	0	0	0	0	0	0	0	0	0	0	0	0	0	0
k_Bacteria;p_Actinobacteria;c_Coriobacteriia;o_Coriobacteriales;f_Eggerthellaceae;g_Enterorhabdus;s_Enterorhabdus mucosicola;	27	137	61	41	42	86	148	31	84	63	55	73	101	81	102	0	59	57	108	99	35	133	87	38	85	190	144	194	743	196	238	91	65	208	287	221	167
k_Bacteria;p_Actinobacteria;c_Coriobacteriia;o_Coriobacteriales;f_Eggerthellaceae;g_Enterorhabdus;s_Enterorhabdus muris;	0	0	0	0	0	0	0	0	0	0	0	0	0	0	0	0	0	0	0	29	0	0	0	0	0	0	0	0	65	0	0	0	0	0	24	0	0
k_Bacteria;p_Actinobacteria;c_Coriobacteriia;o_Coriobacteriales;f_Eggerthellaceae;g_Enterorhabdus;s_mouse gut metagenome;	14	38	24	0	0	29	28	10	10	0	14	36	65	23	30	30	10	0	24	45	9	36	31	24	31	48	32	53	80	27	69	54	16	133	65	38	37
k_Bacteria;p_Actinobacteria;c_Coriobacteriia;o_Coriobacteriales;f_Eggerthellaceae;g_Enterorhabdus;s_uncultured bacterium;	110	139	137	160	40	187	168	79	193	350	167	182	215	356	211	196	59	32	186	301	180	92	124	134	100	359	138	209	919	440	449	339	367	785	360	226	360
k_Bacteria;p_Actinobacteria;c_Coriobacteriia;o_Coriobacteriales;f_Eggerthellaceae;g_Gordonibacter;s_uncultured bacterium;	0	0	0	0	0	0	0	0	0	0	0	0	0	0	0	0	0	0	0	11	0	0	0	0	0	0	0	0	0	0	0	0	0	0	0	0	0
k_Bacteria;p_Actinobacteria;c_Coriobacteriia;o_Coriobacteriales;f_Eggerthellaceae;g_Parvibacter;s_uncultured bacterium;	0	0	4	6	0	0	6	0	0	0	0	4	5	19	8	0	0	0	0	9	5	0	8	0	0	7	0	22	50	20	13	6	12	43	0	8	9
k_Bacteria;p_Actinobacteria;c_Coriobacteriia;o_Coriobacteriales;f_Eggerthellaceae;g_uncultured;s_uncultured Coriobacteriales bacterium;	10	10	18	10	0	14	0	0	12	7	0	8	25	22	15	18	11	0	7	16	4	17	42	13	11	24	10	25	138	48	65	14	21	54	36	30	11
k_Bacteria;p_Actinobacteria;c_Coriobacteriia;o_Coriobacteriales;f_Eggerthellaceae;g_uncultured;s_uncultured bacterium;	0	0	0	0	0	0	0	0	0	0	0	0	0	0	0	0	0	0	0	0	0	0	0	0	0	0	0	0	0	0	0	0	0	0	0	0	0
k_Bacteria;p_Actinobacteria;c_Thermoleophilia;o_Solirubrobacterales;f_Solirubrobacteraceae;;;	0	0	0	0	0	0	0	0	0	0	0	0	0	0	0	0	0	0	0	0	0	0	0	0	0	0	0	0	0	0	0	0	0	0	0	0	0
k_Bacteria;p_Actinobacteria;c_Thermoleophilia;o_Solirubrobacterales;f_Solirubrobacteraceae;g_Conexibacter;;	0	0	0	0	0	0	0	0	0	0	0	0	0	0	0	0	0	0	0	0	0	0	0	0	0	0	0	0	0	0	0	0	0	0	0	0	0
k_Bacteria;p_Actinobacteria;c_Thermoleophilia;o_Solirubrobacterales;f_Solirubrobacteraceae;g_Solirubrobacter;;	0	0	0	0	0	0	0	0	0	0	0	0	0	0	0	0	0	0	0	0	0	0	0	0	0	0	0	0	0	0	0	0	0	0	0	0	0
k_Bacteria;p_Actinobacteria;c_WCHB1-81;o_uncultured eubacterium WCHB1-81;f_uncultured eubacterium WCHB1-81;g_uncultured eubacterium WCHB1-81;s_uncultured eubacterium WCHB1-81;	0	0	2	0	0	0	0	0	0	0	0	0	0	0	0	0	0	0	0	0	0	0	0	0	0	0	0	0	0	0	0	0	0	0	0	0	0
k_Bacteria;p_Bacteroidetes;c_Bacteroidia;;;;;	20	39	21	52	6	28	39	12	20	23	12	25	63	9	38	21	76	8	14	14	17	38	45	77	29	36	48	40	137	60	51	17	30	64	119	26	31
k_Bacteria;p_Bacteroidetes;c_Bacteroidia;o_Bacteroidales;;;;	0	0	0	0	0	0	0	0	0	0	0	0	0	0	0	0	0	0	0	0	0	0	0	0	0	0	0	0	0	0	0	0	0	0	0	0	0
k_Bacteria;p_Bacteroidetes;c_Bacteroidia;o_Bacteroidales;f_Bacteroidaceae;g_Bacteroides;;	329	2593	2464	927	3514	3735	746	3859	1472	181	1067	1594	358	446	2395	714	3008	1518	322	1220	584	5421	480	1507	3300	1144	2536	369	52	4434	2089	1704	1796	1502	1447	623	491
k_Bacteria;p_Bacteroidetes;c_Bacteroidia;o_Bacteroidales;f_Bacteroidaceae;g_Bacteroides;s_Bacteroides acidifaciens;	210	227	289	65	34	161	167	71	187	128	78	281	103	472	136	103	160	73	551	611	66	594	22	68	199	76	133	73	31	131	183	61	338	59	82	11	32
k_Bacteria;p_Bacteroidetes;c_Bacteroidia;o_Bacteroidales;f_Bacteroidaceae;g_Bacteroides;s_Bacteroides caecicola;	0	0	0	0	0	0	0	0	0	0	0	0	0	0	0	0	0	0	0	0	0	0	0	0	0	0	0	0	0	0	2	0	0	3	2	0	0
k_Bacteria;p_Bacteroidetes;c_Bacteroidia;o_Bacteroidales;f_Bacteroidaceae;g_Bacteroides;s_Bacteroides coprocola DSM 17136;	0	0	0	0	0	0	0	0	0	0	4	0	0	0	0	0	0	0	0	0	0	0	0	0	0	0	4	2	5	0	0	0	0	2	7	3	0
k_Bacteria;p_Bacteroidetes;c_Bacteroidia;o_Bacteroidales;f_Bacteroidaceae;g_Bacteroides;s_Bacteroides eggerthii DSM 20697;	0	0	0	0	0	0	0	0	0	0	0	0	0	0	0	0	0	0	0	0	0	0	0	0	0	0	0	0	0	0	0	0	0	0	0	0	0
k_Bacteria;p_Bacteroidetes;c_Bacteroidia;o_Bacteroidales;f_Bacteroidaceae;g_Bacteroides;s_Bacteroides gallinaceum;	0	0	0	0	0	0	0	0	0	0	0	0	0	0	0	0	0	0	0	0	0	0	0	0	0	0	0	0	7	0	0	0	0	0	0	0	0
k_Bacteria;p_Bacteroidetes;c_Bacteroidia;o_Bacteroidales;f_Bacteroidaceae;g_Bacteroides;s_Bacteroides massiliensis B84634 = Timone 84634 = DSM 17679 = JCM 13223;	0	0	0	0	0	0	0	0	0	0	0	0	2	0	0	0	0	0	0	0	0	0	0	0	0	0	0	0	0	4	0	0	0	0	0	0	0
k_Bacteria;p_Bacteroidetes;c_Bacteroidia;o_Bacteroidales;f_Bacteroidaceae;g_Bacteroides;s_Bacteroides plebeius;	0	0	0	0	0	0	5	0	0	0	0	0	10	0	4	0	0	0	0	0	0	0	0	0	0	0	0	0	0	0	5	0	5	0	0	0	0
k_Bacteria;p_Bacteroidetes;c_Bacteroidia;o_Bacteroidales;f_Bacteroidaceae;g_Bacteroides;s_Bacteroides sp. SB5;	0	0	0	0	0	0	0	0	0	0	0	0	0	0	0	0	0	0	0	0	0	0	0	0	0	0	0	0	0	0	0	0	0	0	0	0	0
k_Bacteria;p_Bacteroidetes;c_Bacteroidia;o_Bacteroidales;f_Bacteroidaceae;g_Bacteroides;s_Bacteroides stercoris ATCC 43183;	0	0	0	0	0	0	0	0	0	0	0	0	0	0	0	0	0	0	0	0	0	0	0	0	0	0	0	0	0	0	0	0	0	0	0	0	0
k_Bacteria;p_Bacteroidetes;c_Bacteroidia;o_Bacteroidales;f_Bacteroidaceae;g_Bacteroides;s_Mediterranea massiliensis;	0	0	0	0	0	0	0	0	0	0	0	0	0	0	0	0	0	0	0	0	0	0	0	0	0	0	0	0	0	0	0	0	0	3	0	0	0
k_Bacteria;p_Bacteroidetes;c_Bacteroidia;o_Bacteroidales;f_Bacteroidaceae;g_Bacteroides;s_uncultured Bacteroidales bacterium;	0	0	0	0	0	0	0	0	0	0	0	0	2	0	0	0	2	0	0	0	0	0	0	0	0	0	0	0	0	0	0	0	0	0	0	0	0
k_Bacteria;p_Bacteroidetes;c_Bacteroidia;o_Bacteroidales;f_Bacteroidaceae;g_Bacteroides;s_uncultured bacterium;	0	0	0	0	0	0	0	0	0	0	0	0	0	0	0	0	0	0	0	0	0	0	0	0	0	5	0	0	0	0	0	0	0	0	0	0	0
k_Bacteria;p_Bacteroidetes;c_Bacteroidia;o_Bacteroidales;f_Barnesiellaceae;g_Coprobacter;;	0	0	0	0	0	0	0	0	0	0	0	0	0	0	0	0	0	0	0	0	0	0	0	0	0	0	0	0	0	0	0	0	0	0	0	0	0
k_Bacteria;p_Bacteroidetes;c_Bacteroidia;o_Bacteroidales;f_Dysgonomonadaceae;g_Proteiniphilum;s_uncultured prokaryote;	0	0	0	0	0	0	0	0	0	0	0	0	0	0	0	0	0	0	0	0	0	0	0	0	0	0	0	2	0	0	0	0	0	0	0	0	0
k_Bacteria;p_Bacteroidetes;c_Bacteroidia;o_Bacteroidales;f_F082;g_uncultured bacterium;s_uncultured bacterium;	0	0	0	0	0	0	0	0	0	0	0	0	0	0	0	0	0	0	0	0	0	0	0	0	0	0	0	2	0	0	0	0	0	0	0	0	0
k_Bacteria;p_Bacteroidetes;c_Bacteroidia;o_Bacteroidales;f_Marinifilaceae;g_Butyricimonas;;	0	0	0	0	0	0	0	0	0	0	0	0	0	0	0	0	0	0	0	0	0	0	0	0	0	0	0	0	0	0	0	0	0	0	0	0	0
k_Bacteria;p_Bacteroidetes;c_Bacteroidia;o_Bacteroidales;f_Marinifilaceae;g_Odoribacter;s_gut metagenome;	0	0	0	0	0	0	0	0	0	0	0	0	0	0	0	0	0	0	0	0	0	0	0	0	0	0	0	0	0	0	0	0	0	0	0	0	0
k_Bacteria;p_Bacteroidetes;c_Bacteroidia;o_Bacteroidales;f_Marinifilaceae;g_Odoribacter;s_uncultured bacterium;	214	406	1043	737	1349	782	912	266	275	735	284	165	509	1179	90	1388	322	343	387	1257	543	335	1448	1083	292	588	493	1077	427	2710	650	612	1957	888	1269	785	685
k_Bacteria;p_Bacteroidetes;c_Bacteroidia;o_Bacteroidales;f_Muribaculaceae;;;	1967	618	1527	1948	423	727	898	685	834	862	768	1777	1423	1081	800	1627	1101	655	868	3829	3551	3179	1414	2865	2923	2979	2715	3268	3430	2263	4447	2440	960	2248	2504	3394	2706
k_Bacteria;p_Bacteroidetes;c_Bacteroidia;o_Bacteroidales;f_Muribaculaceae;g_Muribaculum;s_uncultured bacterium;	883	1611	412	831	741	625	55	655	619	744	872	525	587	552	992	183	965	695	1163	1172	326	513	35	203	871	491	784	580	39	84	778	1052	393	248	278	1004	557
k_Bacteria;p_Bacteroidetes;c_Bacteroidia;o_Bacteroidales;f_Muribaculaceae;g_metagenome;s_metagenome;	0	0	0	0	0	0	0	0	0	0	0	0	0	0	0	0	0	0	0	0	0	0	0	0	0	0	0	0	4	0	0	0	0	0	0	0	0
k_Bacteria;p_Bacteroidetes;c_Bacteroidia;o_Bacteroidales;f_Muribaculaceae;g_mouse gut metagenome;s_mouse gut metagenome;	1785	8	721	1041	0	507	682	207	612	660	717	1359	954	737	505	1112	841	256	471	666	2207	2578	1007	1821	1490	2042	1599	2532	3208	2025	3255	1673	294	1499	1871	2212	1883
k_Bacteria;p_Bacteroidetes;c_Bacteroidia;o_Bacteroidales;f_Muribaculaceae;g_uncultured Bacteroidales bacterium;s_uncultured Bacteroidales bacterium;	5524	3550	1973	1956	927	1185	1787	499	3192	2280	2558	2488	2820	2209	2851	1364	4623	1331	6977	3011	6119	4705	3489	2987	4086	5025	3423	5129	2788	4923	5290	5811	2782	5806	5604	4346	5214
k_Bacteria;p_Bacteroidetes;c_Bacteroidia;o_Bacteroidales;f_Muribaculaceae;g_uncultured Porphyromonadaceae bacterium;s_uncultured Porphyromonadaceae bacterium;	0	0	0	0	0	3	0	0	0	0	0	0	0	0	0	0	0	0	0	0	0	0	4	0	0	0	0	0	3	0	0	0	0	0	0	0	0
k_Bacteria;p_Bacteroidetes;c_Bacteroidia;o_Bacteroidales;f_Muribaculaceae;g_uncultured bacterium;s_uncultured bacterium;	11416	10923	7264	4597	4897	5090	4766	4549	10826	3678	7633	8973	9442	4608	10164	5129	10485	7225	5356	12277	6475	6606	4842	6748	10565	8696	10091	9081	7030	5398	7014	8528	8382	3999	7644	7950	8067
k_Bacteria;p_Bacteroidetes;c_Bacteroidia;o_Bacteroidales;f_Porphyromonadaceae;g_Porphyromonas;;	0	0	0	0	0	0	0	0	0	0	0	0	0	0	0	0	0	0	0	0	0	0	0	0	0	0	0	0	0	0	0	0	0	0	0	0	0
k_Bacteria;p_Bacteroidetes;c_Bacteroidia;o_Bacteroidales;f_Porphyromonadaceae;g_Porphyromonas;s_uncultured organism;	0	0	0	0	0	0	0	0	0	0	0	0	0	0	0	0	0	0	0	0	0	0	0	0	0	0	0	0	0	0	0	0	0	0	0	0	0
k_Bacteria;p_Bacteroidetes;c_Bacteroidia;o_Bacteroidales;f_Prevotellaceae;g_Alloprevotella;;	2	0	0	0	0	0	0	0	0	0	0	0	0	0	0	0	0	0	0	0	0	0	0	0	0	0	0	0	0	0	0	0	0	6	0	0	3
k_Bacteria;p_Bacteroidetes;c_Bacteroidia;o_Bacteroidales;f_Prevotellaceae;g_Alloprevotella;s_Prevotellamassilia timonensis;	0	0	0	0	0	0	0	0	0	0	0	0	0	0	0	0	0	0	0	0	0	0	0	0	0	0	0	0	0	0	0	0	0	0	0	0	0
k_Bacteria;p_Bacteroidetes;c_Bacteroidia;o_Bacteroidales;f_Prevotellaceae;g_Alloprevotella;s_uncultured Bacteroidales bacterium;	1778	145	1742	1140	0	956	75	616	2670	391	464	415	619	552	1342	7	580	959	1178	58	388	3027	0	1076	5205	2371	4991	204	0	234	4890	3145	571	455	274	1627	56
k_Bacteria;p_Bacteroidetes;c_Bacteroidia;o_Bacteroidales;f_Prevotellaceae;g_Alloprevotella;s_uncultured bacterium;	0	0	0	0	0	0	0	0	0	0	0	0	0	0	0	0	0	0	0	0	0	0	0	0	0	0	0	0	0	0	0	0	0	0	0	0	0
k_Bacteria;p_Bacteroidetes;c_Bacteroidia;o_Bacteroidales;f_Prevotellaceae;g_Paraprevotella;;	0	0	0	0	0	0	0	0	0	0	0	0	0	0	0	0	0	0	0	0	0	0	0	0	0	0	0	0	0	0	0	0	0	0	0	0	0
k_Bacteria;p_Bacteroidetes;c_Bacteroidia;o_Bacteroidales;f_Prevotellaceae;g_Paraprevotella;s_uncultured organism;	0	0	0	3	0	0	0	0	0	0	0	0	0	0	0	0	0	0	0	0	0	0	0	0	0	0	0	0	0	0	0	0	0	0	0	0	0
k_Bacteria;p_Bacteroidetes;c_Bacteroidia;o_Bacteroidales;f_Prevotellaceae;g_Prevotella 1;s_unidentified;	0	3	0	0	0	0	0	0	0	0	0	2	0	0	0	2	0	0	2	0	0	0	4	0	0	2	0	0	5	0	0	0	2	0	0	0	0
k_Bacteria;p_Bacteroidetes;c_Bacteroidia;o_Bacteroidales;f_Prevotellaceae;g_Prevotella 2;;	0	0	0	0	0	0	0	0	0	0	0	0	0	0	0	0	0	0	0	0	0	0	0	0	0	0	0	0	0	0	0	0	0	0	0	0	0
k_Bacteria;p_Bacteroidetes;c_Bacteroidia;o_Bacteroidales;f_Prevotellaceae;g_Prevotella 2;s_uncultured bacterium;	0	0	0	0	0	0	0	0	0	0	0	0	0	0	0	0	0	0	0	0	0	0	0	0	0	0	0	0	0	0	0	0	0	0	0	0	0
k_Bacteria;p_Bacteroidetes;c_Bacteroidia;o_Bacteroidales;f_Prevotellaceae;g_Prevotella 2;s_uncultured organism;	0	0	0	0	0	0	0	0	0	0	0	0	0	0	0	0	0	0	0	0	0	0	0	0	0	0	0	0	0	0	5	0	0	0	0	0	2
k_Bacteria;p_Bacteroidetes;c_Bacteroidia;o_Bacteroidales;f_Prevotellaceae;g_Prevotella 9;;	0	0	0	6	0	0	0	0	4	0	3	0	5	0	0	2	0	0	3	0	0	0	0	9	0	0	4	3	6	6	11	0	6	0	10	3	10
k_Bacteria;p_Bacteroidetes;c_Bacteroidia;o_Bacteroidales;f_Prevotellaceae;g_Prevotella 9;s_uncultured bacterium;	0	0	0	0	0	0	0	0	0	0	0	0	0	0	0	0	0	0	0	0	0	0	0	0	0	0	0	0	0	0	0	0	0	0	0	0	0
k_Bacteria;p_Bacteroidetes;c_Bacteroidia;o_Bacteroidales;f_Prevotellaceae;g_Prevotella;s_Chlamydia trachomatis;	0	0	0	0	0	0	0	0	0	0	0	0	0	0	0	0	0	0	0	0	0	0	0	0	0	0	0	0	0	0	0	0	0	0	0	0	0
k_Bacteria;p_Bacteroidetes;c_Bacteroidia;o_Bacteroidales;f_Prevotellaceae;g_Prevotella;s_Prevotella bivia;	0	0	0	0	0	0	0	0	0	0	0	0	0	0	0	0	0	0	0	0	0	0	0	0	0	0	0	0	0	0	0	0	0	0	0	0	0
k_Bacteria;p_Bacteroidetes;c_Bacteroidia;o_Bacteroidales;f_Prevotellaceae;g_Prevotellaceae Ga6A1 group;s_uncultured bacterium;	0	0	0	0	0	0	0	0	0	0	0	0	0	0	0	0	3	0	0	0	0	0	0	0	0	0	0	0	0	0	0	0	0	0	0	0	0
k_Bacteria;p_Bacteroidetes;c_Bacteroidia;o_Bacteroidales;f_Prevotellaceae;g_Prevotellaceae UCG-001;s_uncultured bacterium;	1284	3708	3647	2673	2238	5210	1540	3825	7192	1634	1106	6051	2248	2311	6416	1217	5991	4161	6328	5533	3833	7733	1055	3647	8665	1296	7372	1071	121	2707	5204	5237	3426	5061	3010	7279	3311
k_Bacteria;p_Bacteroidetes;c_Bacteroidia;o_Bacteroidales;f_Prevotellaceae;g_Prevotellaceae UCG-003;s_uncultured bacterium;	0	0	0	0	0	0	0	0	0	0	0	0	0	0	0	0	0	0	0	0	0	0	0	0	0	0	0	0	0	0	0	0	0	0	0	0	0
k_Bacteria;p_Bacteroidetes;c_Bacteroidia;o_Bacteroidales;f_Prevotellaceae;g_uncultured;s_metagenome;	0	0	0	0	0	0	0	0	0	0	0	0	0	0	0	0	0	0	0	0	0	0	0	0	0	0	0	0	0	0	0	0	0	0	0	0	0
k_Bacteria;p_Bacteroidetes;c_Bacteroidia;o_Bacteroidales;f_Prolixibacteraceae;g_uncultured;;	0	0	0	0	0	0	0	0	0	0	0	0	0	0	0	0	0	0	0	0	0	0	0	0	0	0	0	0	2	0	0	0	0	0	0	0	0
k_Bacteria;p_Bacteroidetes;c_Bacteroidia;o_Bacteroidales;f_Prolixibacteraceae;g_uncultured;s_benzene mineralizing consortium clone SB-1;	0	0	0	0	0	0	0	0	0	0	0	0	0	0	0	0	0	0	0	0	0	0	0	0	0	0	0	0	0	0	0	0	0	3	0	0	0
k_Bacteria;p_Bacteroidetes;c_Bacteroidia;o_Bacteroidales;f_Rikenellaceae;g_Alistipes;;	0	14	0	21	1529	504	36	334	20	5	0	0	0	0	0	30	0	0	0	31	3	13	17	33	0	10	0	12	0	0	2	0	5	0	11	15	11
k_Bacteria;p_Bacteroidetes;c_Bacteroidia;o_Bacteroidales;f_Rikenellaceae;g_Alistipes;s_Alistipes obesi;	0	0	0	0	0	0	0	0	0	0	0	0	0	0	0	0	0	0	0	0	0	0	0	0	0	0	3	0	0	0	0	0	0	0	0	0	0
k_Bacteria;p_Bacteroidetes;c_Bacteroidia;o_Bacteroidales;f_Rikenellaceae;g_Alistipes;s_uncultured bacterium;	713	537	2625	1792	1524	784	939	787	844	991	94	1465	1499	1059	260	3272	621	630	1360	1112	1269	2298	7578	3175	1450	3390	1379	5234	2603	8616	7154	3372	1689	3098	3196	1793	4307
k_Bacteria;p_Bacteroidetes;c_Bacteroidia;o_Bacteroidales;f_Rikenellaceae;g_Rikenella;s_uncultured bacterium;	117	344	224	19	106	326	191	133	42	58	196	102	159	293	178	63	42	12	58	71	25	45	298	381	125	102	138	284	23	137	587	84	101	787	228	33	88
k_Bacteria;p_Bacteroidetes;c_Bacteroidia;o_Bacteroidales;f_Rikenellaceae;g_Rikenellaceae RC9 gut group;s_uncultured bacterium;	0	0	0	0	0	0	0	0	0	0	0	0	0	0	0	0	0	0	0	0	0	0	0	0	0	0	0	0	0	2	2	0	0	0	11	0	0
k_Bacteria;p_Bacteroidetes;c_Bacteroidia;o_Bacteroidales;f_Rikenellaceae;g_Rikenellaceae RC9 gut group;s_uncultured organism;	0	272	557	32	0	658	86	686	115	84	0	323	22	20	22	20	73	127	0	70	15	599	173	932	1357	258	1272	452	60	124	391	173	344	215	473	0	79
k_Bacteria;p_Bacteroidetes;c_Bacteroidia;o_Bacteroidales;f_Salinivirgaceae;g_uncultured;s_uncultured organism;	0	0	0	0	0	0	0	0	0	0	0	0	0	0	0	0	0	0	0	0	0	0	0	0	0	0	0	0	0	0	0	0	0	0	0	0	0
k_Bacteria;p_Bacteroidetes;c_Bacteroidia;o_Bacteroidales;f_Tannerellaceae;;;	0	0	0	0	0	0	0	0	0	0	0	0	0	0	0	0	0	0	0	0	0	0	0	0	0	0	0	0	0	0	0	0	0	4	0	0	0
k_Bacteria;p_Bacteroidetes;c_Bacteroidia;o_Bacteroidales;f_Tannerellaceae;g_Parabacteroides;;	0	0	0	0	0	0	0	0	0	0	0	0	0	0	0	0	0	0	0	0	0	0	0	0	0	0	0	0	0	0	0	0	0	0	0	0	0
k_Bacteria;p_Bacteroidetes;c_Bacteroidia;o_Bacteroidales;f_Tannerellaceae;g_Parabacteroides;s_Parabacteroides goldsteinii CL02T12C30;	0	0	18	0	600	4	6	14	0	6	0	0	0	0	24	0	12	0	0	0	0	0	0	0	0	0	0	0	0	0	0	0	0	0	0	0	0
k_Bacteria;p_Bacteroidetes;c_Bacteroidia;o_Bacteroidales;f_Tannerellaceae;g_Parabacteroides;s_Parabacteroides merdae;	0	0	0	0	0	0	0	0	0	0	0	0	0	0	0	0	0	0	0	0	0	0	0	0	0	0	0	0	3	0	0	0	3	0	0	0	0
k_Bacteria;p_Bacteroidetes;c_Bacteroidia;o_Flavobacteriales;f_Crocinitomicaceae;;;	0	0	0	0	0	0	0	0	0	0	0	0	0	0	0	0	0	0	0	0	0	0	0	0	0	0	0	0	0	0	0	0	0	0	0	0	0
k_Bacteria;p_Bacteroidetes;c_Bacteroidia;o_Flavobacteriales;f_Flavobacteriaceae;g_Flavobacterium;;	0	0	0	0	0	0	0	0	0	0	0	0	0	0	0	0	0	0	0	0	0	0	0	0	0	0	0	0	0	0	0	0	0	0	0	0	0
k_Bacteria;p_Bacteroidetes;c_Bacteroidia;o_Flavobacteriales;f_Weeksellaceae;g_Chryseobacterium;;	0	0	0	0	0	0	0	0	0	0	0	0	0	0	0	0	0	0	0	0	0	0	3	0	0	0	0	0	0	0	0	0	0	0	0	0	0
k_Bacteria;p_Bacteroidetes;c_Bacteroidia;o_Sphingobacteriales;f_Lentimicrobiaceae;;;	0	0	0	0	0	0	0	0	0	0	0	0	0	0	0	0	0	0	0	0	0	0	0	0	0	0	0	0	0	0	0	0	0	0	0	0	0
k_Bacteria;p_Bacteroidetes;c_Bacteroidia;o_Sphingobacteriales;f_ST-12K33;;;	0	0	0	0	0	0	4	0	0	0	0	0	0	0	0	0	0	0	0	0	0	0	0	0	0	0	0	0	0	0	0	0	0	0	0	0	0
k_Bacteria;p_Bacteroidetes;c_Bacteroidia;o_Sphingobacteriales;f_ST-12K33;g_uncultured Cytophagales bacterium;s_uncultured Cytophagales bacterium;	0	0	0	0	0	0	0	0	0	0	0	0	0	0	0	0	0	0	0	0	0	0	0	0	0	0	0	0	0	0	0	0	0	0	0	2	0
k_Bacteria;p_Bacteroidetes;c_Bacteroidia;o_Sphingobacteriales;f_Sphingobacteriaceae;g_Mucilaginibacter;s_Mucilaginibacter sp. TAPP7;	0	0	0	0	0	0	0	0	0	0	0	0	0	0	0	0	0	0	0	0	0	0	0	0	0	0	0	0	0	0	0	0	0	0	0	0	0
k_Bacteria;p_Caldiserica;c_Caldisericia;o_Caldisericales;f_Caldisericaceae;g_Caldisericum;s_uncultured Caldiserica bacterium;	0	5	4	3	0	3	4	0	0	0	4	0	6	3	0	0	9	0	0	3	0	6	4	0	4	0	3	6	8	0	0	5	3	0	0	4	7
k_Bacteria;p_Caldiserica;c_Caldisericia;o_Caldisericales;f_Caldisericaceae;g_Caldisericum;s_uncultured Caldisericum sp.;	0	0	0	0	0	0	0	0	0	0	0	0	0	0	0	0	0	0	0	0	0	0	0	0	0	0	0	0	0	0	0	0	0	0	0	0	0
k_Bacteria;p_Caldiserica;c_Caldisericia;o_Caldisericales;f_Caldisericaceae;g_Caldisericum;s_uncultured bacterium;	0	0	0	0	0	0	0	0	0	0	0	0	0	0	0	0	0	0	0	0	0	0	0	0	0	0	0	0	0	0	0	0	0	0	0	0	0
k_Bacteria;p_Caldiserica;c_Caldisericia;o_Caldisericales;f_TTA-B15;g_uncultured bacterium;s_uncultured bacterium;	0	0	0	0	0	0	0	0	0	0	0	0	0	0	0	0	0	0	0	0	0	4	0	0	0	0	0	0	0	3	0	0	0	0	3	0	2
k_Bacteria;p_Caldiserica;c_Caldisericia;o_Caldisericales;f_TTA-B1;g_uncultured Chloroflexi bacterium;s_uncultured Chloroflexi bacterium;	0	0	0	0	0	0	0	0	4	0	0	0	0	0	0	0	0	0	0	0	0	0	0	0	0	0	0	0	2	0	0	0	0	0	0	0	0
k_Bacteria;p_Chlamydiae;c_Chlamydiae;o_Chlamydiales;;;;	0	0	0	0	0	0	0	0	0	0	0	0	0	0	0	0	0	0	0	0	0	0	0	0	0	0	0	0	0	0	0	0	0	0	0	0	0
k_Bacteria;p_Chlamydiae;c_Chlamydiae;o_Chlamydiales;f_Parachlamydiaceae;;;	0	0	0	0	0	0	0	0	0	0	0	0	0	0	0	0	0	0	0	0	0	0	0	0	0	0	0	0	0	0	0	0	2	0	0	0	0
k_Bacteria;p_Chlamydiae;c_Chlamydiae;o_Chlamydiales;f_Simkaniaceae;g_uncultured;;	0	0	0	0	0	0	0	0	0	0	0	0	0	0	0	0	0	0	0	0	0	0	0	0	0	0	0	0	0	0	0	0	0	0	0	0	3
k_Bacteria;p_Chloroflexi;c_Anaerolineae;o_ADurb.Bin180;;;;	0	0	0	0	0	0	0	0	0	0	0	0	0	0	0	0	0	0	0	0	0	0	0	0	0	0	0	0	0	0	0	0	0	0	0	0	0
k_Bacteria;p_Chloroflexi;c_Anaerolineae;o_Ardenticatenales;f_uncultured;g_uncultured organism;s_uncultured organism;	0	0	0	0	0	0	0	0	0	0	0	0	0	0	0	0	0	0	0	0	0	0	0	0	0	0	0	0	3	0	0	0	0	0	0	0	0
k_Bacteria;p_Chloroflexi;c_Ktedonobacteria;o_Ktedonobacterales;f_JG30-KF-AS9;g_uncultured bacterium;s_uncultured bacterium;	0	0	0	0	0	0	0	0	0	0	0	0	0	0	0	0	0	0	0	0	0	0	0	0	0	0	0	0	0	0	0	0	0	0	0	0	0
k_Bacteria;p_Cyanobacteria;c_Melainabacteria;o_Gastranaerophilales;;;;	70	18	63	20	114	301	32	52	26	28	13	6	61	45	107	98	16	111	7	126	0	0	455	17	0	9	11	9	0	33	5	19	23	16	0	17	2
k_Bacteria;p_Cyanobacteria;c_Melainabacteria;o_Gastranaerophilales;f_uncultured bacterium;g_uncultured bacterium;s_uncultured bacterium;	0	0	0	0	0	0	0	0	0	0	0	0	0	0	0	0	0	0	0	0	0	0	0	0	0	0	0	0	0	0	0	0	0	0	0	0	0
k_Bacteria;p_Cyanobacteria;c_Oxyphotobacteria;o_Chloroplast;;;;	15	16	11	18	0	15	4	4	10	9	0	23	19	0	18	10	23	0	4	3	12	24	84	26	24	36	28	46	83	68	24	21	9	45	60	22	20
k_Bacteria;p_Cyanobacteria;c_Oxyphotobacteria;o_Chloroplast;f_Planoglabratella opercularis;g_Planoglabratella opercularis;s_Planoglabratella opercularis;	0	0	0	0	0	0	0	0	0	0	0	0	0	0	0	0	0	0	0	0	0	0	0	0	0	0	0	0	0	0	0	3	0	0	0	0	0
k_Bacteria;p_Cyanobacteria;c_Oxyphotobacteria;o_Nostocales;;;;	0	0	0	0	0	0	0	0	0	0	0	0	0	0	0	0	0	0	0	0	0	0	0	0	0	0	0	0	0	0	0	0	0	0	0	0	0
k_Bacteria;p_Cyanobacteria;c_Oxyphotobacteria;o_Nostocales;f_Chroococcidiopsaceae;g_Chroococcidiopsis SAG 2023;;	0	0	0	0	0	0	0	0	0	0	0	0	3	0	0	0	0	0	0	0	0	0	0	0	0	0	0	0	0	0	0	0	0	0	0	0	0
k_Bacteria;p_Deferribacteres;c_Deferribacteres;o_Deferribacterales;f_Deferribacteraceae;g_Mucispirillum;s_Mucispirillum schaedleri ASF457;	0	0	0	0	27	44	90	3	0	0	32	0	22	157	0	97	2	0	0	4	0	9	49	0	0	0	4	0	4	0	17	0	3	5	0	0	0
k_Bacteria;p_Deinococcus-Thermus;c_Deinococci;o_Deinococcales;f_Deinococcaceae;g_Deinococcus;s_Deinococcus wulumuqiensis R12;	0	0	0	0	0	0	0	0	0	0	0	0	0	0	0	0	0	0	0	0	0	0	0	0	0	0	0	0	0	0	0	0	0	0	0	0	0
k_Bacteria;p_Elusimicrobia;c_Elusimicrobia;o_Elusimicrobiales;f_Elusimicrobiaceae;g_Elusimicrobium;s_uncultured bacterium;	0	0	0	0	0	0	0	0	0	0	0	0	0	0	0	0	0	0	0	0	0	0	0	0	0	0	0	0	0	0	0	0	0	0	0	0	0
k_Bacteria;p_Elusimicrobia;c_Endomicrobia;o_Endomicrobiales;f_Endomicrobiaceae;g_Candidatus Endomicrobium;s_uncultured bacterium;	0	0	0	0	0	0	0	0	0	0	0	0	0	0	0	0	0	0	0	0	0	0	0	0	0	0	0	0	0	0	0	0	0	0	0	0	0
k_Bacteria;p_Elusimicrobia;c_Rs-M47;;;;;	0	0	0	0	0	0	0	0	0	0	0	0	0	0	0	0	0	0	0	0	0	0	0	0	0	0	0	0	0	0	0	0	0	0	0	0	0
k_Bacteria;p_Epsilonbacteraeota;c_Campylobacteria;o_Campylobacterales;f_Campylobacteraceae;g_Campylobacter;;	0	0	0	0	0	0	0	0	0	0	0	0	0	0	0	0	0	0	0	0	0	0	0	0	0	0	0	2	0	0	0	0	0	0	0	0	0
k_Bacteria;p_Epsilonbacteraeota;c_Campylobacteria;o_Campylobacterales;f_Helicobacteraceae;g_Helicobacter;;	9	20	10	5	14	58	42	0	15	29	7	10	105	393	0	50	20	22	35	48	0	0	0	165	0	37	0	79	0	0	0	0	0	0	0	0	0
k_Bacteria;p_Epsilonbacteraeota;c_Campylobacteria;o_Campylobacterales;f_Helicobacteraceae;g_Helicobacter;s_uncultured bacterium;	0	0	0	0	0	0	0	0	0	0	0	0	0	0	0	0	0	0	0	0	75	30	151	0	27	0	19	0	338	35	129	38	50	68	815	79	15
k_Bacteria;p_Firmicutes;;;;;;	0	2	0	0	0	0	0	0	0	0	0	0	0	0	0	0	0	0	0	0	0	0	0	0	0	0	0	0	0	0	0	0	0	0	0	0	0
k_Bacteria;p_Firmicutes;c_Bacilli;o_Bacillales;f_Bacillaceae;g_Bacillus;;	0	0	0	0	0	0	0	0	0	0	0	0	2	0	0	0	0	0	0	0	0	0	0	0	0	0	0	6	4	0	0	0	0	0	0	0	0
k_Bacteria;p_Firmicutes;c_Bacilli;o_Bacillales;f_Bacillaceae;g_Pseudogracilibacillus;;	0	0	0	0	0	0	0	0	0	0	0	0	0	0	0	0	0	0	0	0	0	0	0	0	0	0	0	0	4	0	0	0	0	0	0	0	0
k_Bacteria;p_Firmicutes;c_Bacilli;o_Bacillales;f_Listeriaceae;g_Listeria;;	0	0	0	0	0	0	0	0	0	0	0	0	0	0	3	0	0	0	0	0	0	0	0	0	0	0	0	0	0	0	0	0	0	0	0	0	0
k_Bacteria;p_Firmicutes;c_Bacilli;o_Bacillales;f_Paenibacillaceae;g_Ammoniphilus;;	0	0	0	0	0	0	0	0	0	0	0	0	0	0	0	0	3	0	0	0	0	0	0	0	0	0	3	0	0	0	0	0	0	0	0	0	0
k_Bacteria;p_Firmicutes;c_Bacilli;o_Bacillales;f_Paenibacillaceae;g_Paenibacillus;;	0	0	0	0	0	0	0	0	0	0	0	0	0	0	0	0	0	0	0	0	0	0	0	0	0	0	0	0	0	0	0	4	0	0	0	0	0
k_Bacteria;p_Firmicutes;c_Bacilli;o_Bacillales;f_Planococcaceae;g_Planomicrobium;;	0	0	0	0	0	0	0	0	0	0	0	6	0	0	0	0	0	0	0	0	0	0	4	0	0	0	0	0	0	0	0	0	0	0	0	0	0
k_Bacteria;p_Firmicutes;c_Bacilli;o_Bacillales;f_Staphylococcaceae;g_Jeotgalicoccus;;	0	0	0	0	0	0	0	0	0	0	0	0	0	0	0	0	0	0	0	0	0	0	0	0	0	0	0	0	0	0	0	0	0	0	0	0	0
k_Bacteria;p_Firmicutes;c_Bacilli;o_Bacillales;f_Staphylococcaceae;g_Staphylococcus;;	16	39	5	0	0	4	6	0	3	0	0	40	19	0	7	0	49	0	13	5	6	13	54	7	2	16	3	7	39	57	24	8	10	5	21	0	9
k_Bacteria;p_Firmicutes;c_Bacilli;o_Lactobacillales;f_Aerococcaceae;g_Aerococcus;;	0	0	0	0	0	0	0	0	0	0	0	13	4	0	0	0	0	0	21	0	0	6	14	0	0	0	0	0	6	7	0	0	0	0	0	0	0
k_Bacteria;p_Firmicutes;c_Bacilli;o_Lactobacillales;f_Aerococcaceae;g_Facklamia;s_uncultured Facklamia sp.;	0	0	0	0	0	0	0	0	0	0	0	0	0	0	0	0	0	0	11	0	0	0	0	0	0	0	0	0	0	0	0	0	0	0	0	0	0
k_Bacteria;p_Firmicutes;c_Bacilli;o_Lactobacillales;f_Carnobacteriaceae;g_Carnobacterium;;	0	0	0	0	0	0	0	0	0	0	0	0	0	0	0	0	0	0	0	0	0	0	0	0	0	0	0	0	0	0	0	0	0	0	0	0	0
k_Bacteria;p_Firmicutes;c_Bacilli;o_Lactobacillales;f_Carnobacteriaceae;g_Dolosigranulum;s_uncultured bacterium;	0	0	0	0	0	0	2	0	0	0	0	0	0	0	2	0	0	0	0	0	0	0	0	0	0	0	0	0	0	0	0	0	0	0	0	0	0
k_Bacteria;p_Firmicutes;c_Bacilli;o_Lactobacillales;f_Enterococcaceae;g_Enterococcus;;	0	4	40	6	143	6	0	6	6	0	65	6	0	0	0	0	3	0	6	0	3	5	0	4	0	6	5	0	10	5	0	6	0	0	48	0	5
k_Bacteria;p_Firmicutes;c_Bacilli;o_Lactobacillales;f_Enterococcaceae;g_Vagococcus;;	4	0	0	0	0	0	0	0	0	0	0	0	0	0	0	0	0	0	0	0	0	0	6	0	0	0	0	0	0	0	0	0	0	0	0	0	0
k_Bacteria;p_Firmicutes;c_Bacilli;o_Lactobacillales;f_Lactobacillaceae;g_Lactobacillus;;	11596	11666	14133	14962	12660	10560	5609	7101	7493	4693	12215	11013	1997	3960	7143	8579	7228	4132	15426	9463	11900	17582	5812	10865	9105	9671	14883	17183	4906	1736	1930	10638	1464	4338	5943	12936	10489
k_Bacteria;p_Firmicutes;c_Bacilli;o_Lactobacillales;f_Lactobacillaceae;g_Lactobacillus;s_Lactobacillus fermentum;	0	0	8	0	0	0	0	0	0	0	0	0	0	0	2	0	0	0	0	0	0	0	0	2	0	6	0	0	0	0	0	0	0	0	3	0	0
k_Bacteria;p_Firmicutes;c_Bacilli;o_Lactobacillales;f_Lactobacillaceae;g_Lactobacillus;s_Lactobacillus iners AB-1;	0	0	0	0	0	0	0	0	0	0	0	0	0	0	0	0	0	0	0	0	0	0	0	0	0	0	0	0	0	0	0	0	0	0	0	0	0
k_Bacteria;p_Firmicutes;c_Bacilli;o_Lactobacillales;f_Lactobacillaceae;g_Lactobacillus;s_Lactobacillus kunkeei;	0	0	0	0	0	0	0	0	0	0	0	0	0	0	0	0	0	0	0	0	0	0	0	2	0	0	0	0	0	4	0	0	0	0	8	0	0
k_Bacteria;p_Firmicutes;c_Bacilli;o_Lactobacillales;f_Leuconostocaceae;g_Leuconostoc;;	0	0	0	0	0	0	0	0	0	0	0	0	0	0	0	0	0	0	0	0	0	0	0	0	0	0	0	0	0	8	0	0	0	0	0	0	0
k_Bacteria;p_Firmicutes;c_Bacilli;o_Lactobacillales;f_Leuconostocaceae;g_Weissella;;	0	0	0	0	0	0	0	0	0	0	0	0	0	0	0	0	0	0	0	0	0	0	7	0	0	0	0	0	0	8	3	0	0	0	0	0	2
k_Bacteria;p_Firmicutes;c_Bacilli;o_Lactobacillales;f_Streptococcaceae;g_Lactococcus;;	11	0	13	29	0	3	0	0	30	0	0	4	0	0	47	23	20	54	331	440	0	0	0	0	0	10	0	74	0	0	0	0	0	0	0	0	4
k_Bacteria;p_Firmicutes;c_Bacilli;o_Lactobacillales;f_Streptococcaceae;g_Streptococcus;;	54	43	66	15	11	17	29	25	44	0	117	151	53	57	49	25	24	23	43	97	26	125	167	212	13	92	54	154	253	111	179	56	22	201	159	45	257
k_Bacteria;p_Firmicutes;c_Bacilli;o_Lactobacillales;f_Streptococcaceae;g_Streptococcus;s_Streptococcus anginosus subsp. anginosus;	0	0	0	0	0	0	0	0	0	0	0	0	0	0	0	0	0	0	0	0	0	0	0	0	0	0	0	0	0	0	0	0	0	0	0	0	0
k_Bacteria;p_Firmicutes;c_Clostridia;o_Clostridiales;;;;	100	65	20	0	0	0	19	84	48	7	32	0	0	0	56	0	0	0	0	27	0	0	0	0	0	0	0	0	0	0	0	0	0	0	0	0	0
k_Bacteria;p_Firmicutes;c_Clostridia;o_Clostridiales;f_Christensenellaceae;g_Christensenellaceae R-7 group;;	18	20	0	0	0	0	0	0	11	0	12	0	19	10	0	22	0	23	0	18	5	0	0	16	32	0	53	3	0	0	0	118	31	0	0	0	17
k_Bacteria;p_Firmicutes;c_Clostridia;o_Clostridiales;f_Christensenellaceae;g_Christensenellaceae R-7 group;s_uncultured organism;	0	0	0	0	0	0	0	0	0	0	0	0	0	0	0	0	0	0	0	0	0	0	0	0	0	0	0	0	0	0	0	0	0	0	0	0	0
k_Bacteria;p_Firmicutes;c_Clostridia;o_Clostridiales;f_Christensenellaceae;g_Christensenellaceae R-7 group;s_uncultured prokaryote;	0	0	0	0	0	0	0	0	0	0	0	0	0	0	0	0	0	0	0	0	0	0	2	0	0	0	0	0	0	0	0	0	0	0	0	0	0
k_Bacteria;p_Firmicutes;c_Clostridia;o_Clostridiales;f_Christensenellaceae;g_uncultured;s_uncultured bacterium;	0	0	0	0	22	26	8	23	0	8	4	0	13	0	16	6	0	0	0	0	0	0	0	24	11	0	9	0	0	0	0	0	0	0	0	0	0
k_Bacteria;p_Firmicutes;c_Clostridia;o_Clostridiales;f_Clostridiaceae 1;g_Candidatus Arthromitus;s_uncultured bacterium;	0	64	348	0	45	0	20	0	55	16	8	252	40	120	6	356	133	13	0	42	0	656	100	8	133	83	137	316	3337	2641	1284	270	38	0	1081	526	134
k_Bacteria;p_Firmicutes;c_Clostridia;o_Clostridiales;f_Clostridiaceae 1;g_Clostridium sensu stricto 1;;	42	5	5	157	5334	78	0	93	2665	385	4714	2	5	0	0	96	546	1517	587	0	0	4	10	0	0	0	4	0	0	3	5	6110	3	4	3	0	0
k_Bacteria;p_Firmicutes;c_Clostridia;o_Clostridiales;f_Clostridiaceae 1;g_Clostridium sensu stricto 1;s_Clostridium sp. ND2;	0	0	0	0	0	0	0	0	0	0	0	0	0	0	0	0	0	0	0	9	0	0	0	0	0	0	0	0	0	0	0	0	0	0	0	0	0
k_Bacteria;p_Firmicutes;c_Clostridia;o_Clostridiales;f_Clostridiaceae 1;g_Clostridium sensu stricto 7;;	0	0	0	0	0	0	0	0	0	0	0	0	0	0	0	0	0	0	0	0	0	0	0	0	0	0	0	0	0	0	0	0	0	0	0	0	0
k_Bacteria;p_Firmicutes;c_Clostridia;o_Clostridiales;f_Clostridiaceae 1;g_Clostridium sensu stricto 7;s_uncultured Clostridium sp.;	0	0	0	0	0	0	0	0	0	0	0	0	0	0	0	0	0	0	0	0	0	0	0	0	0	0	0	0	2	0	0	0	0	0	0	0	0
k_Bacteria;p_Firmicutes;c_Clostridia;o_Clostridiales;f_Clostridiaceae 1;g_Proteiniclasticum;;	0	0	0	0	0	0	0	0	0	0	0	0	0	0	0	0	0	0	0	0	0	0	0	0	0	0	0	0	0	0	3	0	0	0	0	0	0
k_Bacteria;p_Firmicutes;c_Clostridia;o_Clostridiales;f_Clostridiales vadinBB60 group;;;	0	0	0	0	19	7	0	0	0	0	0	0	0	0	0	8	0	20	0	0	0	4	33	5	0	0	0	0	0	8	10	15	48	0	4	29	0
k_Bacteria;p_Firmicutes;c_Clostridia;o_Clostridiales;f_Clostridiales vadinBB60 group;g_metagenome;s_metagenome;	0	0	0	0	0	0	0	0	0	0	0	0	0	0	0	0	0	0	0	0	0	0	0	0	0	0	0	0	0	0	0	0	0	0	0	0	0
k_Bacteria;p_Firmicutes;c_Clostridia;o_Clostridiales;f_Clostridiales vadinBB60 group;g_uncultured Clostridia bacterium;s_uncultured Clostridia bacterium;	0	0	0	0	0	0	0	0	0	0	0	0	0	0	0	0	0	0	0	0	0	0	5	0	0	0	0	4	0	0	0	0	0	0	0	0	0
k_Bacteria;p_Firmicutes;c_Clostridia;o_Clostridiales;f_Clostridiales vadinBB60 group;g_uncultured Clostridiales bacterium;s_uncultured Clostridiales bacterium;	0	0	0	0	0	0	0	0	0	0	0	0	0	0	0	0	0	0	0	0	0	0	0	0	0	0	0	0	0	0	0	0	0	0	0	0	0
k_Bacteria;p_Firmicutes;c_Clostridia;o_Clostridiales;f_Clostridiales vadinBB60 group;g_uncultured Firmicutes bacterium;s_uncultured Firmicutes bacterium;	0	0	0	0	0	0	0	0	0	0	0	0	0	0	0	0	0	0	0	0	0	0	0	0	0	0	0	0	5	0	0	0	0	0	4	0	0
k_Bacteria;p_Firmicutes;c_Clostridia;o_Clostridiales;f_Clostridiales vadinBB60 group;g_uncultured bacterium;s_uncultured bacterium;	11	62	61	57	103	179	50	9	0	90	27	0	16	108	19	104	0	67	20	68	102	180	750	197	27	31	21	105	54	293	69	77	225	64	94	74	23
k_Bacteria;p_Firmicutes;c_Clostridia;o_Clostridiales;f_Clostridiales vadinBB60 group;g_uncultured organism;s_uncultured organism;	0	0	0	0	0	0	0	0	0	0	0	0	0	0	0	0	0	0	0	0	0	0	0	0	0	0	0	0	0	0	0	0	0	0	0	0	0
k_Bacteria;p_Firmicutes;c_Clostridia;o_Clostridiales;f_Defluviitaleaceae;g_Defluviitaleaceae UCG-011;;	0	0	0	0	0	3	2	16	15	0	71	0	49	0	20	0	0	3	0	0	0	0	0	0	0	0	0	0	0	0	0	0	0	0	0	0	0
k_Bacteria;p_Firmicutes;c_Clostridia;o_Clostridiales;f_Eubacteriaceae;g_Anaerofustis;s_uncultured bacterium;	5	4	6	6	0	19	21	8	0	2	3	5	0	19	0	0	0	2	3	2	0	2	14	5	3	0	0	4	0	22	0	4	0	22	20	13	7
k_Bacteria;p_Firmicutes;c_Clostridia;o_Clostridiales;f_Family XI;g_Anaerococcus;;	0	0	0	0	0	0	0	0	0	0	0	0	0	0	0	0	0	0	0	0	0	0	0	0	0	0	0	0	0	0	0	0	0	0	0	0	0
k_Bacteria;p_Firmicutes;c_Clostridia;o_Clostridiales;f_Family XI;g_Anaerococcus;s_uncultured bacterium;	0	0	0	0	0	0	0	0	0	0	0	0	0	0	0	0	0	0	0	0	0	0	0	0	0	0	0	0	0	0	0	0	0	0	0	0	0
k_Bacteria;p_Firmicutes;c_Clostridia;o_Clostridiales;f_Family XI;g_Ezakiella;;	0	0	0	0	0	0	0	0	0	0	0	0	0	0	0	0	0	0	0	0	0	0	0	0	0	0	0	0	0	0	0	0	0	0	0	0	0
k_Bacteria;p_Firmicutes;c_Clostridia;o_Clostridiales;f_Family XI;g_Finegoldia;s_uncultured bacterium;	0	0	0	0	0	0	0	0	0	0	0	0	0	0	0	0	0	0	0	0	0	0	0	0	0	0	0	0	0	0	0	0	0	0	0	0	0
k_Bacteria;p_Firmicutes;c_Clostridia;o_Clostridiales;f_Family XI;g_Parvimonas;;	0	0	0	0	0	0	0	0	0	0	0	3	0	0	0	0	3	0	0	0	0	0	0	7	0	0	0	0	0	0	0	0	0	0	0	0	0
k_Bacteria;p_Firmicutes;c_Clostridia;o_Clostridiales;f_Family XI;g_Peptoniphilus;;	0	0	0	0	0	0	0	0	0	0	0	0	0	0	0	0	0	0	0	0	0	0	0	0	0	0	0	0	0	0	0	0	0	0	0	0	0
k_Bacteria;p_Firmicutes;c_Clostridia;o_Clostridiales;f_Family XI;g_uncultured;;	0	0	0	0	0	0	0	0	0	0	0	0	0	0	0	0	0	0	0	0	0	0	0	0	0	0	0	0	0	0	3	0	0	0	0	0	0
k_Bacteria;p_Firmicutes;c_Clostridia;o_Clostridiales;f_Family XIII;g_Anaerovorax;s_uncultured bacterium;	0	0	0	0	3	0	0	0	3	4	0	0	0	0	0	6	0	2	0	0	0	0	0	0	0	0	0	0	0	0	0	0	0	0	0	0	0
k_Bacteria;p_Firmicutes;c_Clostridia;o_Clostridiales;f_Family XIII;g_Family XIII AD3011 group;;	20	52	27	8	11	18	10	21	6	6	14	0	6	16	4	3	10	20	0	18	4	28	0	6	30	6	28	18	0	0	24	25	6	6	9	15	0
k_Bacteria;p_Firmicutes;c_Clostridia;o_Clostridiales;f_Family XIII;g_Family XIII AD3011 group;s_uncultured bacterium;	0	0	0	0	0	24	0	0	0	10	0	0	0	0	0	0	0	0	0	0	0	0	0	0	0	0	0	0	0	0	0	0	0	0	0	0	0
k_Bacteria;p_Firmicutes;c_Clostridia;o_Clostridiales;f_Family XIII;g_Family XIII AD3011 group;s_uncultured organism;	0	0	0	0	0	0	0	0	0	0	0	0	0	0	0	0	0	0	0	0	0	0	0	0	0	0	0	0	0	0	0	0	0	0	0	0	0
k_Bacteria;p_Firmicutes;c_Clostridia;o_Clostridiales;f_Family XIII;g_Family XIII UCG-001;s_uncultured bacterium;	0	3	9	7	0	57	64	6	7	43	0	0	51	26	21	54	0	11	5	3	0	4	15	19	0	6	0	26	21	11	38	2	46	31	17	7	11
k_Bacteria;p_Firmicutes;c_Clostridia;o_Clostridiales;f_Family XIII;g_[Eubacterium] brachy group;s_uncultured bacterium;	5	14	16	5	11	92	91	10	30	73	12	6	91	44	29	42	8	36	10	0	4	11	15	16	0	15	0	6	14	31	13	10	39	78	52	23	34
k_Bacteria;p_Firmicutes;c_Clostridia;o_Clostridiales;f_Family XIII;g_[Eubacterium] nodatum group;;	16	37	68	13	28	43	33	33	52	17	35	43	35	32	47	43	24	9	5	63	28	124	153	89	33	7	33	53	21	100	16	15	24	133	22	16	74
k_Bacteria;p_Firmicutes;c_Clostridia;o_Clostridiales;f_Family XIII;g_[Eubacterium] nodatum group;s_uncultured bacterium;	0	0	0	0	0	21	3	29	0	0	0	0	0	0	0	0	0	0	0	0	0	0	0	0	0	0	0	0	0	0	0	0	0	0	0	0	0
k_Bacteria;p_Firmicutes;c_Clostridia;o_Clostridiales;f_Heliobacteriaceae;g_Hydrogenispora;;	0	0	0	0	0	0	0	0	0	0	0	0	0	0	0	0	0	0	0	0	0	0	0	0	0	3	0	0	0	0	0	0	0	0	0	0	0
k_Bacteria;p_Firmicutes;c_Clostridia;o_Clostridiales;f_Lachnospiraceae;;;	2574	1788	4676	6613	2220	10911	10730	3072	3743	13646	2593	1973	14580	9979	4059	4782	3356	6032	2579	3321	2140	7844	10913	8519	3801	10700	7136	7523	10247	16791	14644	5658	24682	10333	10742	6920	8654
k_Bacteria;p_Firmicutes;c_Clostridia;o_Clostridiales;f_Lachnospiraceae;g_A2;;	0	215	0	0	0	0	1573	0	0	0	13	0	0	0	0	190	0	0	0	0	0	0	54	0	15	0	13	51	388	0	17	0	13	30	0	0	8
k_Bacteria;p_Firmicutes;c_Clostridia;o_Clostridiales;f_Lachnospiraceae;g_A2;s_Lachnospiraceae bacterium 3-1;	0	0	0	0	0	0	13	0	0	365	0	0	12	0	25	4683	46	0	0	0	0	0	79	0	382	0	701	197	0	0	5739	0	0	0	0	0	0
k_Bacteria;p_Firmicutes;c_Clostridia;o_Clostridiales;f_Lachnospiraceae;g_A2;s_uncultured bacterium;	11	66	6	20	0	105	514	44	12	57	8	24	79	244	24	178	0	8	24	12	23	135	224	49	20	76	62	259	192	89	72	19	65	10	23	43	31
k_Bacteria;p_Firmicutes;c_Clostridia;o_Clostridiales;f_Lachnospiraceae;g_ASF356;;	0	0	0	0	0	69	0	18	0	0	0	0	23	0	0	0	0	0	0	0	15	0	20	0	0	0	0	0	0	0	0	0	0	0	0	0	0
k_Bacteria;p_Firmicutes;c_Clostridia;o_Clostridiales;f_Lachnospiraceae;g_ASF356;s_uncultured Clostridiales bacterium;	0	0	0	0	0	0	0	0	0	0	0	15	18	0	0	0	0	0	0	0	0	0	0	0	0	0	0	0	0	0	0	0	0	0	0	0	0
k_Bacteria;p_Firmicutes;c_Clostridia;o_Clostridiales;f_Lachnospiraceae;g_ASF356;s_uncultured bacterium;	0	0	57	0	0	38	0	0	8	0	30	14	264	10	9	47	46	0	0	11	262	132	80	246	208	507	428	495	217	5	62	8	12	31	3	46	10
k_Bacteria;p_Firmicutes;c_Clostridia;o_Clostridiales;f_Lachnospiraceae;g_Acetatifactor;;	6	0	0	0	0	0	0	0	0	0	0	0	0	0	0	0	15	0	0	0	0	8	43	19	0	6	0	0	43	0	38	8	13	5	5	5	18
k_Bacteria;p_Firmicutes;c_Clostridia;o_Clostridiales;f_Lachnospiraceae;g_Acetatifactor;s_uncultured bacterium;	0	0	0	314	28	8	0	0	7	0	0	0	237	50	19	59	0	67	11	20	9	0	38	8	0	180	10	110	0	0	0	0	67	0	5	0	41
k_Bacteria;p_Firmicutes;c_Clostridia;o_Clostridiales;f_Lachnospiraceae;g_Acetitomaculum;s_Firmicutes bacterium CAG_194_44_15;	12	12	0	0	0	0	0	0	0	0	0	0	0	0	0	0	0	0	65	8	0	0	0	0	0	13	0	0	0	0	0	0	40	126	49	32	8
k_Bacteria;p_Firmicutes;c_Clostridia;o_Clostridiales;f_Lachnospiraceae;g_Agathobacter;;	0	0	0	0	0	0	0	0	0	0	0	0	0	0	0	0	0	0	0	0	0	0	0	0	0	0	0	0	0	0	0	0	0	0	0	0	0
k_Bacteria;p_Firmicutes;c_Clostridia;o_Clostridiales;f_Lachnospiraceae;g_Agathobacter;s_Eubacterium ramulus;	0	0	0	0	0	0	0	0	0	0	0	0	0	0	0	0	0	0	0	0	0	0	0	0	0	0	0	0	0	0	0	0	0	0	0	0	0
k_Bacteria;p_Firmicutes;c_Clostridia;o_Clostridiales;f_Lachnospiraceae;g_Anaerostipes;;	0	0	0	0	0	0	0	0	0	0	0	0	0	0	164	0	0	0	0	0	0	0	0	0	0	0	0	0	0	0	0	0	0	0	0	0	0
k_Bacteria;p_Firmicutes;c_Clostridia;o_Clostridiales;f_Lachnospiraceae;g_Blautia;;	0	154	177	8	147	752	315	550	9	30	18	49	1714	93	35	179	0	0	16	98	51	37	99	89	51	60	55	29	126	191	22	14	95	199	117	171	44
k_Bacteria;p_Firmicutes;c_Clostridia;o_Clostridiales;f_Lachnospiraceae;g_Blautia;s_Lachnospiraceae bacterium DW59;	0	0	21	0	0	29	41	0	0	0	0	0	0	0	19	0	0	0	0	0	0	0	0	0	0	8	0	0	0	0	0	0	0	0	0	0	0
k_Bacteria;p_Firmicutes;c_Clostridia;o_Clostridiales;f_Lachnospiraceae;g_Butyrivibrio;s_uncultured bacterium;	0	0	0	0	0	0	0	0	0	0	0	0	0	0	0	0	0	0	0	0	0	0	0	0	0	0	0	0	0	0	0	0	0	0	0	0	0
k_Bacteria;p_Firmicutes;c_Clostridia;o_Clostridiales;f_Lachnospiraceae;g_CAG-56;s_uncultured bacterium;	0	0	0	0	0	0	0	0	0	0	0	0	0	0	0	0	0	0	0	0	0	0	0	0	0	0	0	0	0	0	0	0	0	0	0	0	0
k_Bacteria;p_Firmicutes;c_Clostridia;o_Clostridiales;f_Lachnospiraceae;g_Coprococcus 1;;	0	0	0	0	0	0	0	0	0	0	0	0	0	0	0	0	0	0	0	0	0	0	0	0	0	0	0	0	0	0	0	0	0	0	0	0	0
k_Bacteria;p_Firmicutes;c_Clostridia;o_Clostridiales;f_Lachnospiraceae;g_Coprococcus 2;;	0	0	0	0	0	0	0	88	0	0	0	0	0	0	0	0	0	0	0	0	0	0	0	0	0	0	0	0	0	0	0	0	0	0	0	0	0
k_Bacteria;p_Firmicutes;c_Clostridia;o_Clostridiales;f_Lachnospiraceae;g_Coprococcus 2;s_uncultured bacterium;	0	0	0	0	0	0	0	0	0	0	0	0	0	0	0	0	0	0	0	0	0	0	2	0	0	0	0	0	0	0	0	0	0	0	0	0	0
k_Bacteria;p_Firmicutes;c_Clostridia;o_Clostridiales;f_Lachnospiraceae;g_Coprococcus 3;;	0	0	0	0	0	0	0	0	0	0	0	0	0	0	0	0	0	0	0	0	0	0	0	6	0	11	7	0	0	0	0	0	12	0	0	0	4
k_Bacteria;p_Firmicutes;c_Clostridia;o_Clostridiales;f_Lachnospiraceae;g_Dorea;;	0	0	0	0	0	0	0	0	0	0	0	0	0	0	0	0	0	0	0	0	0	0	0	0	0	0	0	0	0	0	0	0	0	0	0	0	0
k_Bacteria;p_Firmicutes;c_Clostridia;o_Clostridiales;f_Lachnospiraceae;g_Fusicatenibacter;;	0	0	0	0	0	0	0	0	0	0	0	0	0	0	0	0	0	0	0	0	0	0	0	0	0	0	0	0	0	0	0	0	0	0	0	0	0
k_Bacteria;p_Firmicutes;c_Clostridia;o_Clostridiales;f_Lachnospiraceae;g_GCA-900066575;s_uncultured bacterium;	152	15	56	256	43	101	324	51	541	260	212	38	1486	2071	100	442	805	180	35	121	92	340	334	136	53	410	107	113	87	407	105	833	452	1053	161	180	42
k_Bacteria;p_Firmicutes;c_Clostridia;o_Clostridiales;f_Lachnospiraceae;g_Howardella;s_Eubacterium sp. oral clone BU061;	0	0	0	0	0	0	0	0	0	0	0	0	0	0	0	0	0	0	0	0	0	0	0	0	0	0	0	0	0	0	0	0	0	0	0	0	0
k_Bacteria;p_Firmicutes;c_Clostridia;o_Clostridiales;f_Lachnospiraceae;g_Lachnoclostridium;;	237	152	689	206	0	129	411	20	337	364	19	118	1588	1034	114	29	43	53	164	90	97	278	412	220	11	154	20	301	1124	1344	74	273	658	2618	560	447	943
k_Bacteria;p_Firmicutes;c_Clostridia;o_Clostridiales;f_Lachnospiraceae;g_Lachnospira;;	0	0	0	0	0	0	0	0	0	0	0	0	0	0	0	0	0	0	0	0	0	0	0	0	0	0	0	0	0	0	0	3	0	0	0	0	0
k_Bacteria;p_Firmicutes;c_Clostridia;o_Clostridiales;f_Lachnospiraceae;g_Lachnospira;s_uncultured bacterium;	0	0	0	0	0	0	0	0	0	0	0	0	0	0	0	0	0	0	0	0	0	0	0	0	0	0	0	0	0	0	0	0	0	0	0	0	0
k_Bacteria;p_Firmicutes;c_Clostridia;o_Clostridiales;f_Lachnospiraceae;g_Lachnospiraceae FCS020 group;;	16	0	6	25	5	38	43	0	18	71	0	0	106	47	10	35	14	6	0	0	27	14	0	18	12	11	19	8	0	73	16	47	71	13	9	41	10
k_Bacteria;p_Firmicutes;c_Clostridia;o_Clostridiales;f_Lachnospiraceae;g_Lachnospiraceae ND3007 group;;	0	0	0	0	0	0	0	0	0	0	0	0	0	0	0	0	0	0	0	0	0	0	0	0	0	0	0	0	0	0	0	0	0	0	0	0	0
k_Bacteria;p_Firmicutes;c_Clostridia;o_Clostridiales;f_Lachnospiraceae;g_Lachnospiraceae NK4A136 group;;	116	458	735	1675	695	1115	2757	431	505	1086	232	1570	3852	2224	368	2713	804	1700	312	280	840	2066	3246	1119	309	1258	470	999	5801	2391	1120	245	3652	1071	5610	1214	406
k_Bacteria;p_Firmicutes;c_Clostridia;o_Clostridiales;f_Lachnospiraceae;g_Lachnospiraceae NK4A136 group;s_Clostridiales bacterium CIEAF 020;	11	53	110	0	170	588	618	74	373	50	0	0	611	0	0	10	68	0	0	48	20	0	21	162	0	0	11	11	71	17	9	0	0	0	31	0	29
k_Bacteria;p_Firmicutes;c_Clostridia;o_Clostridiales;f_Lachnospiraceae;g_Lachnospiraceae NK4A136 group;s_Lachnospiraceae bacterium A4;	0	0	0	0	0	0	0	0	0	0	0	3	10	19	0	0	0	0	0	0	63	67	303	11	0	30	45	4	0	0	0	0	134	0	0	0	0
k_Bacteria;p_Firmicutes;c_Clostridia;o_Clostridiales;f_Lachnospiraceae;g_Lachnospiraceae NK4A136 group;s_Lachnospiraceae bacterium COE1;	240	7	153	182	67	0	165	17	31	73	7	280	66	288	20	105	58	134	0	288	561	172	1175	3514	98	2133	242	230	4823	179	124	24	163	177	646	662	124
k_Bacteria;p_Firmicutes;c_Clostridia;o_Clostridiales;f_Lachnospiraceae;g_Lachnospiraceae NK4A136 group;s_Trichinella pseudospiralis;	0	0	0	0	0	0	0	0	0	0	0	0	0	0	0	0	0	0	0	0	0	0	0	0	0	0	0	0	0	0	0	0	0	0	0	0	0
k_Bacteria;p_Firmicutes;c_Clostridia;o_Clostridiales;f_Lachnospiraceae;g_Lachnospiraceae NK4A136 group;s_uncultured Clostridiales bacterium;	37	0	0	28	12	29	181	11	158	91	208	0	559	0	225	17	17	298	0	188	0	50	29	0	25	75	23	41	0	0	0	46	0	45	61	63	14
k_Bacteria;p_Firmicutes;c_Clostridia;o_Clostridiales;f_Lachnospiraceae;g_Lachnospiraceae NK4A136 group;s_uncultured bacterium;	29	45	84	464	103	598	898	17	189	113	88	112	203	1173	0	523	174	192	44	178	541	150	1376	984	113	574	274	882	619	123	318	330	695	97	269	145	277
k_Bacteria;p_Firmicutes;c_Clostridia;o_Clostridiales;f_Lachnospiraceae;g_Lachnospiraceae UCG-001;;	13	0	22	0	0	4	86	74	77	0	0	0	48	0	0	115	0	0	0	0	0	75	382	0	0	94	6	96	0	0	35	25	9	15	0	0	0
k_Bacteria;p_Firmicutes;c_Clostridia;o_Clostridiales;f_Lachnospiraceae;g_Lachnospiraceae UCG-001;s_uncultured bacterium;	0	0	10	0	0	0	0	0	38	0	0	0	0	0	0	18	0	0	0	0	13	92	24	0	16	0	10	6	93	11	6	0	0	0	0	0	0
k_Bacteria;p_Firmicutes;c_Clostridia;o_Clostridiales;f_Lachnospiraceae;g_Lachnospiraceae UCG-004;s_uncultured bacterium;	0	0	0	0	0	2	0	0	0	0	0	0	0	0	0	0	0	0	0	0	0	0	0	0	0	0	0	0	0	0	0	0	0	0	0	0	0
k_Bacteria;p_Firmicutes;c_Clostridia;o_Clostridiales;f_Lachnospiraceae;g_Lachnospiraceae UCG-006;;	0	23	212	0	0	8	144	0	0	86	0	48	29	0	80	0	11	0	57	31	20	26	6	34	0	21	0	27	51	337	19	91	66	84	86	12	134
k_Bacteria;p_Firmicutes;c_Clostridia;o_Clostridiales;f_Lachnospiraceae;g_Lachnospiraceae UCG-006;s_uncultured bacterium;	187	69	72	194	0	199	425	872	21	3575	25	161	331	544	74	30	228	159	53	49	126	13	273	50	13	54	28	124	1684	1688	476	302	460	5104	821	709	366
k_Bacteria;p_Firmicutes;c_Clostridia;o_Clostridiales;f_Lachnospiraceae;g_Lachnospiraceae UCG-008;s_metagenome;	0	0	0	0	0	0	0	0	0	0	0	0	0	0	0	0	0	0	0	0	0	0	0	0	0	0	0	0	0	0	0	0	0	0	0	0	0
k_Bacteria;p_Firmicutes;c_Clostridia;o_Clostridiales;f_Lachnospiraceae;g_Lachnospiraceae UCG-010;s_uncultured bacterium;	6	0	2	0	0	0	0	0	0	5	0	0	0	3	2	8	0	0	0	0	0	6	15	9	0	4	4	0	4	5	0	4	6	0	10	0	0
k_Bacteria;p_Firmicutes;c_Clostridia;o_Clostridiales;f_Lachnospiraceae;g_Lachnospiraceae UCG-010;s_uncultured organism;	0	0	0	0	0	0	0	0	0	0	0	0	0	0	0	0	0	0	0	0	0	2	0	0	0	0	0	0	0	0	0	0	0	0	0	0	0
k_Bacteria;p_Firmicutes;c_Clostridia;o_Clostridiales;f_Lachnospiraceae;g_Marvinbryantia;;	0	0	0	0	0	8	0	14	16	0	0	0	0	0	31	0	0	0	0	13	0	0	0	0	0	0	0	0	0	0	0	0	0	0	0	0	0
k_Bacteria;p_Firmicutes;c_Clostridia;o_Clostridiales;f_Lachnospiraceae;g_Marvinbryantia;s_Clostridiales bacterium CIEAF 012;	34	14	51	0	8	13	13	0	17	7	4	26	0	9	37	0	36	12	0	51	11	6	14	7	132	31	103	35	6	15	40	83	16	65	31	17	55
k_Bacteria;p_Firmicutes;c_Clostridia;o_Clostridiales;f_Lachnospiraceae;g_Marvinbryantia;s_uncultured bacterium;	781	0	94	78	0	0	162	0	28	34	26	519	0	140	709	0	1263	0	352	914	109	1117	7	1395	507	22	398	89	69	96	106	339	4	105	0	490	3
k_Bacteria;p_Firmicutes;c_Clostridia;o_Clostridiales;f_Lachnospiraceae;g_Roseburia;;	261	0	9	0	18	17	35	3	66	104	26	5	140	256	10	64	0	0	0	0	0	3	235	13	14	25	19	74	169	6	87	27	77	191	357	0	7
k_Bacteria;p_Firmicutes;c_Clostridia;o_Clostridiales;f_Lachnospiraceae;g_Roseburia;s_Clostridium sp. Clone-44;	0	0	0	0	0	0	320	0	0	0	0	0	0	0	0	0	0	0	0	0	0	0	0	8	0	0	0	0	15	0	0	0	25	78	0	7	0
k_Bacteria;p_Firmicutes;c_Clostridia;o_Clostridiales;f_Lachnospiraceae;g_Roseburia;s_Eubacterium sp. 14-2;	0	0	0	0	0	0	0	0	0	0	0	0	9	0	0	0	0	0	0	0	0	0	0	0	10	0	11	0	0	0	0	0	13	14	0	85	0
k_Bacteria;p_Firmicutes;c_Clostridia;o_Clostridiales;f_Lachnospiraceae;g_Roseburia;s_gut metagenome;	0	0	0	0	0	0	0	0	0	0	0	0	0	0	0	0	0	0	0	0	0	0	0	0	0	0	0	0	0	0	0	0	0	0	0	0	0
k_Bacteria;p_Firmicutes;c_Clostridia;o_Clostridiales;f_Lachnospiraceae;g_Roseburia;s_mouse gut metagenome;	0	0	0	0	0	0	0	0	0	0	5	0	0	0	0	0	0	0	0	0	0	0	0	0	0	0	0	0	0	0	0	0	0	0	0	0	0
k_Bacteria;p_Firmicutes;c_Clostridia;o_Clostridiales;f_Lachnospiraceae;g_Roseburia;s_uncultured Clostridiales bacterium;	20	0	0	0	0	0	0	0	14	0	0	0	0	0	0	0	0	0	0	0	14	56	0	0	0	0	0	59	0	0	0	0	0	347	12	0	60
k_Bacteria;p_Firmicutes;c_Clostridia;o_Clostridiales;f_Lachnospiraceae;g_Roseburia;s_uncultured bacterium;	55	0	0	5	24	294	0	116	229	60	36	0	1079	5	281	58	0	36	17	96	0	55	0	66	0	80	0	20	0	28	54	34	88	53	54	0	44
k_Bacteria;p_Firmicutes;c_Clostridia;o_Clostridiales;f_Lachnospiraceae;g_Tyzzerella 3;s_uncultured bacterium;	0	27	87	30	52	142	0	37	95	23	22	14	0	14	0	1193	11	0	3	86	42	86	83	14	55	105	159	202	137	226	170	20	90	23	84	53	100
k_Bacteria;p_Firmicutes;c_Clostridia;o_Clostridiales;f_Lachnospiraceae;g_Tyzzerella;s_uncultured bacterium;	11	0	51	31	7	14	41	13	8	13	6	8	7	29	11	37	18	0	4	0	0	11	26	26	3	8	6	7	26	30	14	29	41	14	25	13	38
k_Bacteria;p_Firmicutes;c_Clostridia;o_Clostridiales;f_Lachnospiraceae;g_[Acetivibrio] ethanolgignens group;s_uncultured bacterium;	0	0	0	0	0	0	0	0	0	0	0	0	0	0	0	0	0	0	0	0	0	0	0	0	6	0	17	0	0	0	0	0	0	0	0	0	0
k_Bacteria;p_Firmicutes;c_Clostridia;o_Clostridiales;f_Lachnospiraceae;g_[Eubacterium] eligens group;;	0	0	0	0	0	0	0	0	0	0	0	0	0	0	0	0	0	0	0	0	0	0	0	0	3	0	0	0	0	4	0	0	0	0	0	0	0
k_Bacteria;p_Firmicutes;c_Clostridia;o_Clostridiales;f_Lachnospiraceae;g_[Eubacterium] hallii group;;	0	0	0	0	0	0	0	0	0	0	0	0	0	0	0	0	0	0	0	0	0	0	0	0	0	0	0	0	0	0	0	0	0	0	0	0	0
k_Bacteria;p_Firmicutes;c_Clostridia;o_Clostridiales;f_Lachnospiraceae;g_[Eubacterium] ruminantium group;s_uncultured bacterium;	0	0	0	0	0	0	0	0	0	0	0	0	0	0	0	0	0	0	0	0	0	0	0	0	0	0	0	0	0	0	3	0	0	2	0	0	0
k_Bacteria;p_Firmicutes;c_Clostridia;o_Clostridiales;f_Lachnospiraceae;g_[Eubacterium] ventriosum group;;	0	0	0	0	0	0	0	0	0	0	0	0	0	0	0	0	0	0	0	0	0	0	0	0	0	0	0	0	0	0	0	0	0	0	0	0	0
k_Bacteria;p_Firmicutes;c_Clostridia;o_Clostridiales;f_Lachnospiraceae;g_[Eubacterium] ventriosum group;s_uncultured Clostridiales bacterium;	0	0	0	0	0	11	0	6	8	0	11	0	0	0	18	0	0	3	0	0	0	0	0	0	18	0	30	0	0	0	0	0	0	0	7	0	0
k_Bacteria;p_Firmicutes;c_Clostridia;o_Clostridiales;f_Lachnospiraceae;g_[Eubacterium] xylanophilum group;;	0	0	0	0	0	0	0	0	0	0	0	0	0	0	0	0	0	0	0	0	0	0	0	0	0	0	0	0	0	0	0	0	0	0	0	0	0
k_Bacteria;p_Firmicutes;c_Clostridia;o_Clostridiales;f_Lachnospiraceae;g_[Eubacterium] xylanophilum group;s_uncultured bacterium;	6	74	114	342	174	343	761	75	0	12	21	90	99	1340	60	277	84	60	8	142	0	755	371	0	96	59	82	105	513	548	332	129	644	11	351	461	39
k_Bacteria;p_Firmicutes;c_Clostridia;o_Clostridiales;f_Lachnospiraceae;g_[Ruminococcus] gauvreauii group;;	0	0	0	0	0	0	0	0	0	0	0	0	0	0	0	0	0	0	0	0	0	0	0	0	0	0	0	0	0	0	0	0	0	0	0	0	0
k_Bacteria;p_Firmicutes;c_Clostridia;o_Clostridiales;f_Lachnospiraceae;g_[Ruminococcus] torques group;;	0	0	0	0	0	0	0	0	0	0	0	0	0	0	0	0	0	0	0	0	0	0	0	0	0	0	0	0	0	0	0	0	0	0	0	0	0
k_Bacteria;p_Firmicutes;c_Clostridia;o_Clostridiales;f_Lachnospiraceae;g_[Ruminococcus] torques group;s_uncultured Clostridiales bacterium;	0	0	0	0	0	0	0	0	0	0	0	0	0	0	0	0	0	0	0	0	0	0	0	0	0	0	0	0	0	0	0	0	0	0	0	0	0
k_Bacteria;p_Firmicutes;c_Clostridia;o_Clostridiales;f_Lachnospiraceae;g_[Ruminococcus] torques group;s_uncultured bacterium;	0	0	0	0	0	0	0	0	0	0	0	0	0	0	0	0	0	0	0	0	0	0	0	0	67	0	90	0	0	0	0	0	0	0	0	0	0
k_Bacteria;p_Firmicutes;c_Clostridia;o_Clostridiales;f_Lachnospiraceae;g_uncultured;;	100	48	6	189	6	11	170	29	30	147	0	188	1337	277	11	375	232	0	62	255	21	0	108	189	0	126	16	140	0	101	440	0	8	613	0	106	0
k_Bacteria;p_Firmicutes;c_Clostridia;o_Clostridiales;f_Lachnospiraceae;g_uncultured;s_Clostridium sp. Clone-47;	60	0	0	0	0	0	0	0	0	0	0	0	0	13	0	0	0	0	12	0	0	0	0	0	0	0	10	50	0	0	0	0	0	0	73	0	0
k_Bacteria;p_Firmicutes;c_Clostridia;o_Clostridiales;f_Lachnospiraceae;g_uncultured;s_Clostridium sp. Clone-49;	19	0	0	0	0	127	0	0	63	0	0	0	0	0	0	0	49	0	21	0	85	0	0	0	19	115	25	0	0	0	0	129	0	0	0	0	0
k_Bacteria;p_Firmicutes;c_Clostridia;o_Clostridiales;f_Lachnospiraceae;g_uncultured;s_Clostridium sp. Culture-27;	0	0	0	56	0	11	10	0	0	0	0	0	0	6	0	0	5	0	9	4	0	4	22	6	9	12	23	3	421	12	14	26	16	4	40	5	7
k_Bacteria;p_Firmicutes;c_Clostridia;o_Clostridiales;f_Lachnospiraceae;g_uncultured;s_Clostridium sp. Culture-41;	0	12	9	62	8	19	415	0	0	0	11	16	54	152	27	8	40	134	11	12	0	184	38	49	9	22	0	24	157	29	50	0	70	64	96	52	30
k_Bacteria;p_Firmicutes;c_Clostridia;o_Clostridiales;f_Lachnospiraceae;g_uncultured;s_Clostridium sp. Culture-54;	4	0	0	28	14	9	111	5	8	12	0	0	0	114	45	23	36	8	7	0	0	0	12	24	17	30	35	24	125	20	57	44	75	54	114	45	34
k_Bacteria;p_Firmicutes;c_Clostridia;o_Clostridiales;f_Lachnospiraceae;g_uncultured;s_Frisingicoccus caecimuris;	0	0	0	0	0	0	0	88	0	0	0	0	0	0	0	0	0	0	0	0	0	0	0	0	0	0	0	0	0	0	0	0	0	0	0	0	0
k_Bacteria;p_Firmicutes;c_Clostridia;o_Clostridiales;f_Lachnospiraceae;g_uncultured;s_uncultured bacterium;	8	0	0	9	0	0	44	0	0	0	0	0	0	0	0	33	0	0	0	6	0	0	137	59	0	0	0	34	0	28	10	10	79	18	0	8	0
k_Bacteria;p_Firmicutes;c_Clostridia;o_Clostridiales;f_MAT-CR-H4-C10;g_uncultured organism;s_uncultured organism;	0	0	0	0	0	0	0	0	0	0	0	0	0	0	0	0	0	0	0	0	0	0	0	0	0	0	0	0	0	0	0	0	0	0	0	0	0
k_Bacteria;p_Firmicutes;c_Clostridia;o_Clostridiales;f_Peptococcaceae;g_Desulfonispora;s_Desulfonispora thiosulfatigenes DSM 11270;	0	0	0	0	0	0	0	0	0	0	0	0	0	0	0	0	0	0	0	0	0	0	0	0	0	0	0	0	0	0	0	2	0	0	0	0	0
k_Bacteria;p_Firmicutes;c_Clostridia;o_Clostridiales;f_Peptococcaceae;g_Desulfosporosinus;;	0	0	0	0	0	0	0	0	0	0	0	0	0	0	0	0	0	0	0	0	0	0	0	0	0	0	0	0	0	0	0	0	0	0	0	0	0
k_Bacteria;p_Firmicutes;c_Clostridia;o_Clostridiales;f_Peptococcaceae;g_Peptococcus;s_uncultured bacterium;	0	2	0	8	0	5	7	7	9	0	0	0	0	13	0	16	3	0	0	2	0	17	17	3	0	9	15	10	12	33	32	10	8	15	38	7	9
k_Bacteria;p_Firmicutes;c_Clostridia;o_Clostridiales;f_Peptococcaceae;g_SCADC1-2-3;;	0	0	0	0	0	0	0	0	0	0	0	0	0	0	0	0	0	0	0	0	0	0	0	0	0	0	0	0	0	0	0	0	0	0	0	0	0
k_Bacteria;p_Firmicutes;c_Clostridia;o_Clostridiales;f_Peptococcaceae;g_SCADC1-2-3;s_uncultured Clostridia bacterium;	0	0	0	0	0	0	0	0	0	0	0	0	0	0	0	0	0	0	0	0	0	0	0	0	0	0	0	0	0	0	0	0	0	0	0	0	0
k_Bacteria;p_Firmicutes;c_Clostridia;o_Clostridiales;f_Peptococcaceae;g_uncultured;;	0	0	0	0	0	0	0	0	0	0	0	0	0	0	0	0	0	0	0	0	0	0	0	0	0	0	0	0	0	0	2	0	0	0	0	0	0
k_Bacteria;p_Firmicutes;c_Clostridia;o_Clostridiales;f_Peptococcaceae;g_uncultured;s_uncultured bacterium;	24	9	48	105	26	104	131	36	65	45	29	61	183	111	38	122	32	84	0	34	13	34	80	112	13	43	83	66	185	192	106	88	357	124	161	136	88
k_Bacteria;p_Firmicutes;c_Clostridia;o_Clostridiales;f_Peptococcaceae;g_uncultured;s_uncultured organism;	0	0	0	0	0	0	0	8	0	0	0	0	0	0	2	0	0	0	0	0	0	0	0	0	0	0	0	0	0	0	0	0	0	0	0	0	0
k_Bacteria;p_Firmicutes;c_Clostridia;o_Clostridiales;f_Peptostreptococcaceae;;;	0	0	0	0	0	0	0	0	0	0	0	0	0	0	0	0	0	0	0	0	0	0	0	0	0	0	0	0	0	0	0	6	0	0	0	0	0
k_Bacteria;p_Firmicutes;c_Clostridia;o_Clostridiales;f_Peptostreptococcaceae;g_Filifactor;s_uncultured bacterium;	0	0	0	0	0	0	0	0	0	0	0	0	0	0	0	0	0	0	0	0	0	0	0	0	0	0	0	0	0	0	0	0	0	0	0	0	0
k_Bacteria;p_Firmicutes;c_Clostridia;o_Clostridiales;f_Peptostreptococcaceae;g_Intestinibacter;;	0	0	0	0	0	0	0	0	0	0	0	0	0	0	0	0	0	0	0	0	0	0	0	0	0	0	0	0	0	0	0	0	0	0	0	0	0
k_Bacteria;p_Firmicutes;c_Clostridia;o_Clostridiales;f_Peptostreptococcaceae;g_Peptostreptococcus;;	0	0	0	0	0	0	0	0	0	0	0	0	0	0	0	0	0	0	0	0	0	0	0	0	0	0	0	0	0	0	0	0	0	0	0	0	0
k_Bacteria;p_Firmicutes;c_Clostridia;o_Clostridiales;f_Peptostreptococcaceae;g_Romboutsia;;	1649	0	0	427	1697	12	0	1172	0	65	120	0	0	0	0	0	32	0	12	0	0	0	12	0	0	0	0	0	12	7	0	2701	0	0	0	0	0
k_Bacteria;p_Firmicutes;c_Clostridia;o_Clostridiales;f_Peptostreptococcaceae;g_Terrisporobacter;s_uncultured bacterium;	0	0	0	0	0	0	0	0	0	0	0	0	0	0	6	0	0	0	0	5	0	5	0	0	4	0	5	10	14	0	6	0	0	4	8	0	0
k_Bacteria;p_Firmicutes;c_Clostridia;o_Clostridiales;f_Ruminococcaceae;;;	224	240	280	751	700	1141	790	256	195	289	109	124	857	628	253	828	252	933	155	462	292	475	869	284	263	463	522	387	459	972	486	1095	1814	636	638	542	501
k_Bacteria;p_Firmicutes;c_Clostridia;o_Clostridiales;f_Ruminococcaceae;g_Anaerotruncus;s_uncultured bacterium;	4	10	0	15	9	199	29	7	38	5	11	25	283	15	19	57	11	0	0	79	4	36	490	168	59	42	85	43	9	0	0	11	34	8	3	14	10
k_Bacteria;p_Firmicutes;c_Clostridia;o_Clostridiales;f_Ruminococcaceae;g_Anaerotruncus;s_uncultured organism;	0	0	0	0	0	0	0	0	0	0	0	0	4	0	0	0	0	0	0	0	0	0	0	0	0	0	0	0	0	0	0	0	0	0	0	0	0
k_Bacteria;p_Firmicutes;c_Clostridia;o_Clostridiales;f_Ruminococcaceae;g_Angelakisella;;	0	0	0	15	0	13	0	0	0	5	10	0	25	25	0	15	0	0	0	15	8	0	0	26	0	18	4	0	40	8	14	0	10	0	11	0	0
k_Bacteria;p_Firmicutes;c_Clostridia;o_Clostridiales;f_Ruminococcaceae;g_Butyricicoccus;;	0	0	0	2	0	4	0	0	0	0	0	0	0	0	0	0	0	0	0	0	25	0	0	0	0	2	9	15	2	0	0	0	0	16	0	36	4
k_Bacteria;p_Firmicutes;c_Clostridia;o_Clostridiales;f_Ruminococcaceae;g_Butyricicoccus;s_Butyricicoccus sp. K4410.MGS-46;	0	0	0	0	0	0	0	0	0	0	0	0	0	0	0	0	0	0	0	0	0	0	0	0	0	0	0	0	0	0	0	0	0	0	0	0	0
k_Bacteria;p_Firmicutes;c_Clostridia;o_Clostridiales;f_Ruminococcaceae;g_Butyricicoccus;s_uncultured bacterium;	52	14	120	531	16	56	1999	12	146	58	61	24	116	388	37	685	137	222	7	122	292	133	936	116	28	134	50	134	559	284	902	84	1594	228	619	455	104
k_Bacteria;p_Firmicutes;c_Clostridia;o_Clostridiales;f_Ruminococcaceae;g_Candidatus Soleaferrea;;	0	0	0	0	0	0	0	0	0	0	0	0	0	0	0	0	0	0	0	0	0	0	0	0	0	0	0	0	0	0	0	0	0	0	0	0	0
k_Bacteria;p_Firmicutes;c_Clostridia;o_Clostridiales;f_Ruminococcaceae;g_Candidatus Soleaferrea;s_Bittarella massiliensis;	0	0	0	0	0	4	0	10	0	0	0	0	0	0	0	0	0	0	0	0	0	0	0	0	0	0	0	0	0	0	0	0	0	0	0	0	0
k_Bacteria;p_Firmicutes;c_Clostridia;o_Clostridiales;f_Ruminococcaceae;g_Candidatus Soleaferrea;s_uncultured bacterium;	30	0	0	49	0	0	5	5	16	0	19	2	44	4	0	4	0	0	9	0	0	10	116	16	3	26	0	0	11	22	320	3	0	0	0	0	0
k_Bacteria;p_Firmicutes;c_Clostridia;o_Clostridiales;f_Ruminococcaceae;g_DTU089;;	0	0	0	0	0	0	0	0	0	0	0	0	0	0	0	0	0	0	0	0	0	0	0	0	0	0	0	0	3	0	0	0	0	0	0	0	0
k_Bacteria;p_Firmicutes;c_Clostridia;o_Clostridiales;f_Ruminococcaceae;g_Faecalibacterium;;	0	3	4	0	0	0	9	0	0	0	0	3	0	0	0	0	4	0	0	0	0	0	0	15	4	7	0	0	10	0	0	12	0	8	5	0	0
k_Bacteria;p_Firmicutes;c_Clostridia;o_Clostridiales;f_Ruminococcaceae;g_Faecalibacterium;s_uncultured bacterium;	0	0	0	0	0	0	0	0	0	0	0	0	0	0	0	0	0	0	0	0	3	0	0	0	0	0	0	0	0	3	4	0	0	0	0	0	0
k_Bacteria;p_Firmicutes;c_Clostridia;o_Clostridiales;f_Ruminococcaceae;g_GCA-900066225;;	0	0	0	0	0	5	5	0	5	0	5	0	10	0	0	5	0	0	0	0	0	4	20	12	0	0	0	0	0	0	11	0	0	0	0	0	0
k_Bacteria;p_Firmicutes;c_Clostridia;o_Clostridiales;f_Ruminococcaceae;g_GCA-900066225;s_uncultured bacterium;	0	0	0	0	0	7	0	0	0	0	0	0	0	0	0	0	0	0	0	3	0	0	0	0	0	0	0	0	0	0	0	0	3	0	0	0	0
k_Bacteria;p_Firmicutes;c_Clostridia;o_Clostridiales;f_Ruminococcaceae;g_Harryflintia;s_uncultured bacterium;	0	0	6	17	3	10	0	0	0	5	4	0	18	15	3	7	0	0	7	8	0	0	0	0	0	0	0	0	0	0	0	0	0	0	0	0	0
k_Bacteria;p_Firmicutes;c_Clostridia;o_Clostridiales;f_Ruminococcaceae;g_Hydrogenoanaerobacterium;s_uncultured bacterium;	0	2	0	0	0	0	0	0	0	0	0	0	0	0	0	0	0	0	0	0	0	0	0	0	0	0	0	0	0	0	0	0	0	0	0	0	0
k_Bacteria;p_Firmicutes;c_Clostridia;o_Clostridiales;f_Ruminococcaceae;g_Hydrogenoanaerobacterium;s_uncultured rumen bacterium;	0	0	0	0	2	0	0	0	0	0	0	0	2	0	0	3	0	0	0	0	0	0	0	0	0	0	0	0	0	0	0	0	4	0	0	0	0
k_Bacteria;p_Firmicutes;c_Clostridia;o_Clostridiales;f_Ruminococcaceae;g_Intestinimonas;;	0	11	79	48	57	645	49	77	81	14	99	0	61	70	19	234	46	9	0	118	40	34	60	87	53	483	76	141	97	59	81	659	93	178	66	78	44
k_Bacteria;p_Firmicutes;c_Clostridia;o_Clostridiales;f_Ruminococcaceae;g_Intestinimonas;s_uncultured bacterium;	34	15	17	0	68	0	27	89	7	0	7	6	5	22	0	81	15	0	0	43	0	17	240	0	10	104	17	70	80	29	20	25	87	14	11	24	0
k_Bacteria;p_Firmicutes;c_Clostridia;o_Clostridiales;f_Ruminococcaceae;g_Negativibacillus;s_uncultured bacterium;	3	3	8	15	0	0	16	3	14	0	6	0	11	16	11	50	0	0	0	7	0	63	100	14	19	37	42	32	0	0	51	17	44	0	9	16	0
k_Bacteria;p_Firmicutes;c_Clostridia;o_Clostridiales;f_Ruminococcaceae;g_Oscillibacter;;	69	10	139	191	92	730	78	90	206	63	22	41	991	314	110	319	88	61	7	147	73	103	489	145	47	87	73	109	183	122	338	36	1270	785	94	183	107
k_Bacteria;p_Firmicutes;c_Clostridia;o_Clostridiales;f_Ruminococcaceae;g_Oscillibacter;s_Clostridiales bacterium CIEAF 021;	0	0	15	48	0	0	0	0	15	18	0	0	0	50	0	25	0	8	0	0	27	13	13	37	0	0	0	21	9	0	0	0	37	0	10	0	0
k_Bacteria;p_Firmicutes;c_Clostridia;o_Clostridiales;f_Ruminococcaceae;g_Oscillibacter;s_Oscillibacter sp. 1-3;	8	0	0	28	0	0	15	0	0	0	0	0	0	0	0	0	14	0	0	0	0	0	0	0	0	0	0	0	0	0	0	0	0	0	0	0	0
k_Bacteria;p_Firmicutes;c_Clostridia;o_Clostridiales;f_Ruminococcaceae;g_Oscillibacter;s_uncultured bacterium;	0	0	58	25	0	34	149	14	0	33	0	67	21	46	0	115	1	0	0	15	83	92	232	236	0	80	13	103	106	120	43	51	109	36	62	51	9
k_Bacteria;p_Firmicutes;c_Clostridia;o_Clostridiales;f_Ruminococcaceae;g_Oscillibacter;s_uncultured organism;	0	0	0	0	0	0	0	0	0	0	0	0	0	0	0	0	0	0	0	0	0	0	0	0	0	3	0	0	0	0	0	0	0	0	0	0	0
k_Bacteria;p_Firmicutes;c_Clostridia;o_Clostridiales;f_Ruminococcaceae;g_Ruminiclostridium 1;;	0	0	0	0	0	0	0	0	0	0	0	0	0	0	0	0	0	0	0	0	0	0	0	0	0	0	0	0	0	0	0	7	0	0	0	0	0
k_Bacteria;p_Firmicutes;c_Clostridia;o_Clostridiales;f_Ruminococcaceae;g_Ruminiclostridium 5;;	33	10	25	5	32	35	101	0	25	31	0	12	85	65	11	321	54	17	5	6	0	30	18	80	18	32	8	70	256	145	215	52	524	56	83	77	127
k_Bacteria;p_Firmicutes;c_Clostridia;o_Clostridiales;f_Ruminococcaceae;g_Ruminiclostridium 5;s_Ruminiclostridium sp. KB18;	0	0	21	23	0	33	0	0	0	17	0	0	0	32	8	0	0	0	0	0	18	0	64	0	0	23	0	0	0	49	0	0	160	7	0	0	30
k_Bacteria;p_Firmicutes;c_Clostridia;o_Clostridiales;f_Ruminococcaceae;g_Ruminiclostridium 5;s_uncultured Clostridiales bacterium;	20	10	26	56	18	70	146	17	19	110	25	10	148	78	13	90	27	23	18	32	25	26	47	41	10	19	25	20	135	75	40	15	112	66	99	53	64
k_Bacteria;p_Firmicutes;c_Clostridia;o_Clostridiales;f_Ruminococcaceae;g_Ruminiclostridium 5;s_uncultured bacterium;	127	107	27	132	20	846	106	19	0	453	16	0	69	224	6	19	26	46	11	10	27	184	25	29	46	115	102	143	18	433	74	7	68	1245	187	249	38
k_Bacteria;p_Firmicutes;c_Clostridia;o_Clostridiales;f_Ruminococcaceae;g_Ruminiclostridium 5;s_uncultured organism;	0	0	0	0	0	0	0	0	0	0	0	0	0	0	0	0	0	0	0	0	0	0	0	0	0	0	0	0	0	0	0	0	0	0	0	0	0
k_Bacteria;p_Firmicutes;c_Clostridia;o_Clostridiales;f_Ruminococcaceae;g_Ruminiclostridium 6;s_uncultured bacterium;	12	13	0	90	30	5	155	57	15	99	9	0	75	317	0	213	0	0	6	25	0	0	58	5	2	0	0	2	22	50	25	154	306	8	7	17	124
k_Bacteria;p_Firmicutes;c_Clostridia;o_Clostridiales;f_Ruminococcaceae;g_Ruminiclostridium 9;;	0	15	147	347	85	211	180	82	45	93	22	98	448	748	61	376	166	85	12	74	41	83	333	240	132	145	208	167	232	588	240	48	777	381	268	250	343
k_Bacteria;p_Firmicutes;c_Clostridia;o_Clostridiales;f_Ruminococcaceae;g_Ruminiclostridium 9;s_uncultured Clostridiales bacterium;	15	0	0	31	0	38	0	0	15	0	0	0	0	0	0	0	0	0	0	0	23	0	0	0	0	0	0	0	11	0	0	0	0	0	0	0	0
k_Bacteria;p_Firmicutes;c_Clostridia;o_Clostridiales;f_Ruminococcaceae;g_Ruminiclostridium 9;s_uncultured bacterium;	11	0	8	41	0	0	26	0	0	0	0	0	0	37	0	7	0	0	0	3	36	3	36	38	0	0	0	13	0	6	6	8	13	0	30	0	0
k_Bacteria;p_Firmicutes;c_Clostridia;o_Clostridiales;f_Ruminococcaceae;g_Ruminiclostridium;s_Clostridium merdae;	0	0	0	0	0	0	0	0	0	0	0	0	0	0	0	0	0	0	0	0	0	0	0	0	0	0	0	0	0	0	0	3	0	0	0	0	0
k_Bacteria;p_Firmicutes;c_Clostridia;o_Clostridiales;f_Ruminococcaceae;g_Ruminiclostridium;s_uncultured bacterium;	44	13	61	265	68	129	208	21	77	38	22	38	174	138	59	183	38	41	8	169	171	136	122	492	45	294	70	158	166	454	711	63	447	301	256	332	113
k_Bacteria;p_Firmicutes;c_Clostridia;o_Clostridiales;f_Ruminococcaceae;g_Ruminococcaceae NK4A214 group;;	0	0	0	0	0	0	0	0	0	0	0	0	0	0	0	0	0	0	0	0	0	0	0	0	0	0	0	0	0	0	0	0	0	0	0	0	0
k_Bacteria;p_Firmicutes;c_Clostridia;o_Clostridiales;f_Ruminococcaceae;g_Ruminococcaceae NK4A214 group;s_gut metagenome;	0	0	0	0	0	0	0	0	0	0	0	0	0	0	0	0	0	0	0	0	0	0	0	0	0	0	0	0	0	0	0	0	0	0	0	0	0
k_Bacteria;p_Firmicutes;c_Clostridia;o_Clostridiales;f_Ruminococcaceae;g_Ruminococcaceae NK4A214 group;s_uncultured bacterium;	7	17	37	12	9	32	24	0	50	4	9	0	48	20	74	47	0	11	5	28	0	22	41	38	12	67	21	25	0	43	67	43	7	56	54	31	6
k_Bacteria;p_Firmicutes;c_Clostridia;o_Clostridiales;f_Ruminococcaceae;g_Ruminococcaceae UCG-002;;	0	0	0	0	0	0	0	0	0	0	0	0	0	0	0	0	3	0	0	0	0	0	0	0	0	0	0	0	0	0	0	0	0	0	0	0	0
k_Bacteria;p_Firmicutes;c_Clostridia;o_Clostridiales;f_Ruminococcaceae;g_Ruminococcaceae UCG-002;s_uncultured bacterium;	0	0	0	0	0	0	0	0	0	0	0	0	0	0	0	0	0	0	0	0	0	0	0	0	0	0	0	0	0	0	0	0	0	0	0	0	0
k_Bacteria;p_Firmicutes;c_Clostridia;o_Clostridiales;f_Ruminococcaceae;g_Ruminococcaceae UCG-002;s_uncultured rumen bacterium;	0	0	0	0	0	0	0	0	0	0	0	0	0	0	0	0	0	0	0	0	0	0	0	0	0	0	0	0	0	0	0	0	0	0	0	0	0
k_Bacteria;p_Firmicutes;c_Clostridia;o_Clostridiales;f_Ruminococcaceae;g_Ruminococcaceae UCG-003;;	0	0	0	0	0	0	0	0	0	0	0	0	0	0	0	0	0	0	0	0	0	0	0	0	0	0	0	0	0	0	0	0	0	0	0	0	0
k_Bacteria;p_Firmicutes;c_Clostridia;o_Clostridiales;f_Ruminococcaceae;g_Ruminococcaceae UCG-003;s_uncultured bacterium;	21	0	0	117	0	168	71	27	17	14	0	0	85	56	33	48	0	47	0	0	0	0	15	0	0	19	0	0	0	21	0	0	37	23	11	0	0
k_Bacteria;p_Firmicutes;c_Clostridia;o_Clostridiales;f_Ruminococcaceae;g_Ruminococcaceae UCG-004;;	11	7	8	3	6	10	9	9	13	5	0	7	6	11	5	10	6	0	0	6	4	0	10	20	5	12	11	14	27	39	25	23	27	43	36	9	37
k_Bacteria;p_Firmicutes;c_Clostridia;o_Clostridiales;f_Ruminococcaceae;g_Ruminococcaceae UCG-004;s_uncultured bacterium;	8	0	38	0	11	45	0	26	32	104	26	0	59	103	0	50	34	33	11	8	5	8	45	19	0	15	16	16	28	32	30	37	162	84	40	20	26
k_Bacteria;p_Firmicutes;c_Clostridia;o_Clostridiales;f_Ruminococcaceae;g_Ruminococcaceae UCG-005;;	0	0	0	0	0	10	0	0	0	0	2	0	0	0	0	0	0	3	0	5	0	0	0	0	0	0	0	16	0	0	0	0	5	0	0	0	0
k_Bacteria;p_Firmicutes;c_Clostridia;o_Clostridiales;f_Ruminococcaceae;g_Ruminococcaceae UCG-005;s_uncultured Clostridiales bacterium;	0	15	0	0	0	107	8	6	0	4	0	0	10	0	0	153	0	0	0	7	0	0	0	0	0	63	0	0	0	0	0	0	101	20	4	48	8
k_Bacteria;p_Firmicutes;c_Clostridia;o_Clostridiales;f_Ruminococcaceae;g_Ruminococcaceae UCG-005;s_uncultured bacterium;	0	0	0	0	17	0	0	7	0	0	0	0	0	0	0	0	0	0	0	0	0	0	0	0	0	0	0	0	0	0	0	0	0	0	0	0	0
k_Bacteria;p_Firmicutes;c_Clostridia;o_Clostridiales;f_Ruminococcaceae;g_Ruminococcaceae UCG-008;s_uncultured bacterium;	0	0	0	0	0	0	0	1212	0	0	0	0	0	0	0	0	0	0	0	0	0	0	0	0	0	0	0	0	0	0	0	0	0	0	0	0	0
k_Bacteria;p_Firmicutes;c_Clostridia;o_Clostridiales;f_Ruminococcaceae;g_Ruminococcaceae UCG-009;;	15	0	7	18	0	0	19	10	15	3	6	15	8	45	25	23	11	14	4	11	9	11	75	23	5	16	26	20	66	75	25	17	52	59	40	33	16
k_Bacteria;p_Firmicutes;c_Clostridia;o_Clostridiales;f_Ruminococcaceae;g_Ruminococcaceae UCG-009;s_uncultured bacterium;	0	0	0	0	0	0	0	25	0	0	0	0	0	0	0	0	0	0	0	0	0	0	0	0	0	0	0	0	0	0	0	0	0	0	0	0	0
k_Bacteria;p_Firmicutes;c_Clostridia;o_Clostridiales;f_Ruminococcaceae;g_Ruminococcaceae UCG-009;s_uncultured organism;	0	0	0	0	0	0	0	0	0	0	0	0	0	0	0	0	0	0	0	0	0	0	0	0	0	0	0	0	0	0	0	0	0	0	0	0	0
k_Bacteria;p_Firmicutes;c_Clostridia;o_Clostridiales;f_Ruminococcaceae;g_Ruminococcaceae UCG-010;;	0	0	0	0	3	0	0	0	0	0	0	0	0	0	0	0	0	18	0	0	0	0	0	0	0	0	0	0	0	0	0	0	0	0	0	0	0
k_Bacteria;p_Firmicutes;c_Clostridia;o_Clostridiales;f_Ruminococcaceae;g_Ruminococcaceae UCG-010;s_gut metagenome;	0	0	0	0	0	0	0	0	0	0	0	0	0	0	0	0	0	0	0	0	0	0	0	0	0	0	0	0	0	0	0	0	0	0	0	0	0
k_Bacteria;p_Firmicutes;c_Clostridia;o_Clostridiales;f_Ruminococcaceae;g_Ruminococcaceae UCG-010;s_uncultured bacterium;	0	0	0	0	0	2	0	0	2	4	0	0	0	0	0	0	0	4	0	0	0	0	0	14	0	0	0	0	0	0	0	0	0	0	0	0	0
k_Bacteria;p_Firmicutes;c_Clostridia;o_Clostridiales;f_Ruminococcaceae;g_Ruminococcaceae UCG-010;s_uncultured organism;	0	26	15	0	0	11	20	0	7	15	31	0	0	0	2	0	0	11	0	0	0	0	0	0	16	0	13	19	0	0	0	0	0	0	0	0	0
k_Bacteria;p_Firmicutes;c_Clostridia;o_Clostridiales;f_Ruminococcaceae;g_Ruminococcaceae UCG-010;s_uncultured rumen bacterium;	0	0	0	0	0	0	0	0	0	0	0	0	0	0	0	0	0	7	0	0	0	0	0	0	0	0	0	0	0	0	0	0	0	0	0	0	0
k_Bacteria;p_Firmicutes;c_Clostridia;o_Clostridiales;f_Ruminococcaceae;g_Ruminococcaceae UCG-013;;	8	88	92	107	66	304	244	390	73	947	77	51	488	13	16	37	169	131	94	33	99	261	564	78	119	154	197	152	12	1035	23	47	109	125	252	106	138
k_Bacteria;p_Firmicutes;c_Clostridia;o_Clostridiales;f_Ruminococcaceae;g_Ruminococcaceae UCG-013;s_uncultured organism;	16	22	12	0	0	0	0	63	0	0	0	0	0	0	0	0	0	0	66	0	0	0	0	0	0	0	0	0	0	0	0	0	0	0	0	0	0
k_Bacteria;p_Firmicutes;c_Clostridia;o_Clostridiales;f_Ruminococcaceae;g_Ruminococcaceae UCG-014;;	351	660	181	55	254	710	406	280	263	220	251	539	448	201	734	811	206	259	271	350	141	619	310	76	243	972	321	1576	168	525	422	1268	1231	1095	804	605	342
k_Bacteria;p_Firmicutes;c_Clostridia;o_Clostridiales;f_Ruminococcaceae;g_Ruminococcaceae UCG-014;s_gut metagenome;	0	0	0	0	0	0	0	0	0	0	0	0	0	0	0	0	0	0	0	0	0	0	0	0	0	0	0	0	0	0	0	0	0	0	0	0	0
k_Bacteria;p_Firmicutes;c_Clostridia;o_Clostridiales;f_Ruminococcaceae;g_Ruminococcaceae UCG-014;s_uncultured Clostridiales bacterium;	0	0	0	0	5	0	9	0	0	0	0	0	0	0	0	0	0	0	0	0	0	18	0	0	0	11	0	59	0	0	36	20	0	0	12	0	0
k_Bacteria;p_Firmicutes;c_Clostridia;o_Clostridiales;f_Ruminococcaceae;g_Ruminococcaceae UCG-014;s_uncultured Firmicutes bacterium;	0	0	0	0	0	0	0	0	0	0	0	0	0	0	0	0	0	0	0	0	0	0	0	0	0	0	0	0	0	0	0	0	0	0	0	0	0
k_Bacteria;p_Firmicutes;c_Clostridia;o_Clostridiales;f_Ruminococcaceae;g_Ruminococcaceae UCG-014;s_uncultured bacterium;	45	64	16	5	130	254	105	80	16	181	52	15	71	152	17	807	0	22	184	57	24	66	50	163	0	407	22	223	115	209	104	270	68	346	440	102	47
k_Bacteria;p_Firmicutes;c_Clostridia;o_Clostridiales;f_Ruminococcaceae;g_Ruminococcaceae UCG-014;s_unidentified rumen bacterium JW32;	0	26	0	0	0	0	0	5	3	0	8	0	0	0	28	0	0	0	0	0	0	0	0	0	0	0	2	0	0	0	0	154	0	0	0	0	0
k_Bacteria;p_Firmicutes;c_Clostridia;o_Clostridiales;f_Ruminococcaceae;g_Ruminococcaceae UCG-014;s_unidentified;	0	1351	0	0	114	0	415	835	236	0	529	0	98	0	0	64	0	0	0	90	0	12	173	0	18	26	45	20	0	0	13	91	21	10	0	15	0
k_Bacteria;p_Firmicutes;c_Clostridia;o_Clostridiales;f_Ruminococcaceae;g_Ruminococcus 1;;	0	0	0	0	9	1865	608	1388	5	75	40	7	10	0	607	0	0	147	0	0	0	0	0	239	400	38	463	9	0	107	0	2	52	7	2	68	4
k_Bacteria;p_Firmicutes;c_Clostridia;o_Clostridiales;f_Ruminococcaceae;g_Ruminococcus 1;s_metagenome;	0	0	0	0	0	0	0	0	0	0	0	0	0	0	0	0	0	0	0	0	0	0	0	0	0	0	0	0	0	0	0	0	0	0	0	0	0
k_Bacteria;p_Firmicutes;c_Clostridia;o_Clostridiales;f_Ruminococcaceae;g_Ruminococcus 1;s_uncultured organism;	0	0	0	0	0	0	0	0	0	0	0	0	0	0	0	0	0	0	0	0	0	0	0	0	0	3	0	0	0	0	0	0	0	0	0	0	0
k_Bacteria;p_Firmicutes;c_Clostridia;o_Clostridiales;f_Ruminococcaceae;g_Ruminococcus 2;;	0	0	0	0	0	668	0	273	0	0	0	0	0	0	0	0	0	0	0	0	0	0	0	0	0	0	0	0	0	4	0	0	0	0	0	0	0
k_Bacteria;p_Firmicutes;c_Clostridia;o_Clostridiales;f_Ruminococcaceae;g_Subdoligranulum;;	0	0	0	0	0	0	0	0	0	0	0	0	0	0	3	0	0	0	0	0	0	0	0	0	0	0	0	3	0	0	0	0	0	0	0	2	0
k_Bacteria;p_Firmicutes;c_Clostridia;o_Clostridiales;f_Ruminococcaceae;g_Subdoligranulum;s_uncultured bacterium;	3	0	0	0	0	0	3	0	0	0	0	0	0	0	0	0	0	0	0	0	0	0	0	0	0	0	0	0	0	4	0	0	0	0	0	0	0
k_Bacteria;p_Firmicutes;c_Clostridia;o_Clostridiales;f_Ruminococcaceae;g_UBA1819;;	0	0	0	0	0	0	0	5	0	0	0	0	0	0	0	0	0	0	0	0	0	0	0	0	0	0	0	0	0	0	0	0	0	0	0	0	0
k_Bacteria;p_Firmicutes;c_Clostridia;o_Clostridiales;f_Ruminococcaceae;g_UBA1819;s_uncultured bacterium;	4	0	0	11	9	26	41	5	0	3	4	0	96	31	5	12	0	13	0	11	0	0	0	0	0	0	0	0	0	0	0	3	0	0	0	0	0
k_Bacteria;p_Firmicutes;c_Clostridia;o_Clostridiales;f_Ruminococcaceae;g_[Eubacterium] coprostanoligenes group;;	0	0	0	0	0	0	0	0	322	2	3	0	0	0	0	0	0	297	0	0	0	0	0	0	0	0	0	0	0	0	0	0	0	0	0	0	0
k_Bacteria;p_Firmicutes;c_Clostridia;o_Clostridiales;f_Ruminococcaceae;g_[Eubacterium] coprostanoligenes group;s_gut metagenome;	288	130	77	68	0	86	0	755	24	166	0	25	54	163	204	199	217	0	98	123	0	548	7	423	7	661	9	9	116	746	820	209	370	191	64	140	46
k_Bacteria;p_Firmicutes;c_Clostridia;o_Clostridiales;f_Ruminococcaceae;g_[Eubacterium] coprostanoligenes group;s_human gut metagenome;	0	0	0	0	0	0	0	0	0	0	0	0	0	0	0	0	0	0	0	0	0	0	0	0	0	0	0	0	0	0	0	0	0	0	3	0	0
k_Bacteria;p_Firmicutes;c_Clostridia;o_Clostridiales;f_Ruminococcaceae;g_[Eubacterium] coprostanoligenes group;s_uncultured bacterium;	0	0	0	0	0	15	0	50	0	0	0	0	0	0	0	0	0	0	0	3	0	0	0	0	0	0	0	0	0	0	0	0	0	0	0	0	0
k_Bacteria;p_Firmicutes;c_Clostridia;o_Clostridiales;f_Ruminococcaceae;g_[Eubacterium] coprostanoligenes group;s_uncultured organism;	0	0	0	0	0	0	0	0	0	0	0	0	0	0	0	0	0	0	0	0	0	0	0	0	0	0	0	0	0	0	0	0	0	0	0	0	0
k_Bacteria;p_Firmicutes;c_Clostridia;o_Clostridiales;f_Ruminococcaceae;g_uncultured;;	121	0	70	316	47	220	221	18	34	58	0	33	140	436	41	128	108	26	25	129	136	26	186	279	35	42	71	176	639	348	414	42	591	231	340	216	483
k_Bacteria;p_Firmicutes;c_Clostridia;o_Clostridiales;f_Ruminococcaceae;g_uncultured;s_Ruminococcus sp. YE281;	0	0	0	0	0	0	0	0	0	0	0	0	0	0	0	0	0	0	0	0	0	0	0	0	0	0	0	0	0	0	0	0	0	0	0	0	0
k_Bacteria;p_Firmicutes;c_Clostridia;o_Clostridiales;f_Ruminococcaceae;g_uncultured;s_gut metagenome;	0	0	0	0	0	0	0	0	0	0	0	0	0	0	0	0	0	0	0	0	0	0	0	0	0	0	0	0	0	0	0	0	0	0	0	0	0
k_Bacteria;p_Firmicutes;c_Clostridia;o_Clostridiales;f_Ruminococcaceae;g_uncultured;s_uncultured Oscillospira sp.;	0	0	0	7	8	36	50	0	0	31	0	0	25	0	12	9	0	0	0	6	0	0	0	14	0	0	0	0	7	0	0	0	6	0	0	0	0
k_Bacteria;p_Firmicutes;c_Clostridia;o_Clostridiales;f_Ruminococcaceae;g_uncultured;s_uncultured Ruminococcus sp.;	0	0	0	0	0	0	0	0	0	7	5	0	0	0	0	0	0	0	0	0	0	0	0	0	0	0	0	0	0	0	0	0	0	0	0	0	0
k_Bacteria;p_Firmicutes;c_Clostridia;o_Clostridiales;f_Syntrophomonadaceae;g_Dethiobacter;s_uncultured bacterium;	0	0	0	0	0	0	0	0	0	0	0	0	0	0	0	0	0	0	0	0	0	0	0	0	0	0	0	0	0	0	0	0	0	0	0	0	2
k_Bacteria;p_Firmicutes;c_Erysipelotrichia;o_Erysipelotrichales;f_Erysipelotrichaceae;;;	0	140	0	8	8	0	0	26	0	0	0	0	2	0	27	0	140	8	25	42	18	0	0	0	0	0	0	11	0	0	0	61	0	0	21	0	23
k_Bacteria;p_Firmicutes;c_Erysipelotrichia;o_Erysipelotrichales;f_Erysipelotrichaceae;g_Candidatus Stoquefichus;s_uncultured bacterium;	63	0	98	0	0	26	11	61	99	62	28	70	0	6	0	4	0	0	0	0	0	668	85	147	827	121	899	96	514	60	165	39	160	306	293	199	0
k_Bacteria;p_Firmicutes;c_Erysipelotrichia;o_Erysipelotrichales;f_Erysipelotrichaceae;g_Catenibacterium;;	0	0	0	0	0	0	0	0	0	0	0	0	0	0	0	0	0	0	0	0	0	0	0	0	0	0	0	0	0	0	0	0	0	0	0	0	0
k_Bacteria;p_Firmicutes;c_Erysipelotrichia;o_Erysipelotrichales;f_Erysipelotrichaceae;g_Catenibacterium;s_uncultured bacterium;	0	0	0	0	0	0	0	0	0	0	0	0	0	0	0	0	0	0	0	0	0	0	0	0	0	0	0	0	0	0	0	0	0	0	0	0	0
k_Bacteria;p_Firmicutes;c_Erysipelotrichia;o_Erysipelotrichales;f_Erysipelotrichaceae;g_Erysipelatoclostridium;;	0	0	0	0	0	8	0	9	0	0	12	13	0	0	6	0	6	0	0	0	0	51	28	0	199	0	106	0	126	0	119	0	0	0	0	0	0
k_Bacteria;p_Firmicutes;c_Erysipelotrichia;o_Erysipelotrichales;f_Erysipelotrichaceae;g_Erysipelatoclostridium;s_uncultured bacterium;	0	36	21	5	7	58	14	193	4	9	361	61	224	126	100	3	209	3	17	0	10	1141	77	23	146	25	97	67	118	59	177	438	184	118	207	126	0
k_Bacteria;p_Firmicutes;c_Erysipelotrichia;o_Erysipelotrichales;f_Erysipelotrichaceae;g_Erysipelotrichaceae UCG-003;s_uncultured bacterium;	0	0	0	0	0	0	0	1378	424	0	8	0	0	0	838	0	0	0	0	0	0	0	0	0	0	0	0	0	0	0	0	0	0	0	0	0	0
k_Bacteria;p_Firmicutes;c_Erysipelotrichia;o_Erysipelotrichales;f_Erysipelotrichaceae;g_Erysipelotrichaceae UCG-004;s_uncultured bacterium;	0	0	0	0	0	0	0	0	0	0	0	0	0	0	0	0	0	0	0	0	0	0	0	0	0	0	0	0	0	0	0	0	0	0	0	0	0
k_Bacteria;p_Firmicutes;c_Erysipelotrichia;o_Erysipelotrichales;f_Erysipelotrichaceae;g_Faecalibaculum;s_uncultured bacterium;	0	0	0	0	0	0	0	4	0	0	0	0	0	0	0	0	0	0	0	0	0	0	0	0	0	0	0	0	0	0	0	0	0	0	0	0	0
k_Bacteria;p_Firmicutes;c_Erysipelotrichia;o_Erysipelotrichales;f_Erysipelotrichaceae;g_Holdemanella;;	0	0	0	0	0	0	0	0	0	0	0	0	0	0	0	0	0	0	0	0	0	0	0	0	0	0	0	0	0	0	0	0	0	0	0	0	0
k_Bacteria;p_Firmicutes;c_Erysipelotrichia;o_Erysipelotrichales;f_Erysipelotrichaceae;g_Holdemanella;s_uncultured bacterium;	0	0	0	0	0	0	0	0	0	0	0	0	0	0	0	0	0	0	0	0	0	0	0	0	0	0	0	0	0	0	0	0	0	0	0	0	0
k_Bacteria;p_Firmicutes;c_Erysipelotrichia;o_Erysipelotrichales;f_Erysipelotrichaceae;g_Merdibacter;s_uncultured bacterium;	0	0	0	0	0	0	0	0	0	0	0	0	0	0	0	0	0	0	0	0	0	0	0	0	0	0	0	0	0	0	0	0	0	0	2	0	0
k_Bacteria;p_Firmicutes;c_Erysipelotrichia;o_Erysipelotrichales;f_Erysipelotrichaceae;g_Turicibacter;;	491	0	0	163	0	0	0	0	0	0	68	0	0	0	0	0	0	0	0	0	0	0	0	0	0	0	0	0	0	0	0	0	0	0	0	0	0
k_Bacteria;p_Firmicutes;c_Erysipelotrichia;o_Erysipelotrichales;f_Erysipelotrichaceae;g_Turicibacter;s_uncultured bacterium;	11592	0	5	3830	0	2	0	306	1514	1357	3701	9	2	0	0	4044	3416	714	1304	4	0	0	4	0	0	0	0	10	0	5	3	1049	30	0	3	0	4
k_Bacteria;p_Firmicutes;c_Erysipelotrichia;o_Erysipelotrichales;f_Erysipelotrichaceae;g_uncultured bacterium;s_uncultured bacterium;	12	24	4	0	4	8	6	6	0	19	3	0	14	11	0	7	0	6	5	11	2	4	55	2	5	0	4	0	7	17	26	8	9	13	73	4	3
k_Bacteria;p_Firmicutes;c_Erysipelotrichia;o_Erysipelotrichales;f_Erysipelotrichaceae;g_uncultured;s_uncultured bacterium;	25	12	27	7	20	517	196	29	21	52	5	462	34	54	221	196	19	9	20	186	60	725	1142	71	46	41	57	272	374	47	295	26	16	1418	64	39	118
k_Bacteria;p_Firmicutes;c_Limnochordia;o_Limnochordales;f_Limnochordaceae;g_uncultured bacterium;s_uncultured bacterium;	0	0	0	0	0	0	0	0	0	0	0	0	0	0	0	0	0	0	0	0	0	0	0	0	0	0	0	0	0	0	0	0	0	0	0	0	0
k_Bacteria;p_Firmicutes;c_Negativicutes;o_Selenomonadales;f_Acidaminococcaceae;g_Acidaminococcus;;	0	0	0	0	0	0	0	0	0	0	0	0	0	0	0	0	0	0	0	0	0	0	0	0	0	0	0	0	0	0	0	0	0	0	3	0	0
k_Bacteria;p_Firmicutes;c_Negativicutes;o_Selenomonadales;f_Acidaminococcaceae;g_Acidaminococcus;s_uncultured bacterium;	0	0	0	0	0	0	0	0	0	0	0	0	0	0	0	0	0	0	0	0	0	0	0	0	0	0	0	0	0	0	0	0	0	0	0	0	0
k_Bacteria;p_Firmicutes;c_Negativicutes;o_Selenomonadales;f_Acidaminococcaceae;g_Phascolarctobacterium;;	0	0	0	0	0	0	0	0	0	0	0	0	0	0	0	0	0	0	2	0	0	0	0	0	0	0	0	0	4	0	0	0	0	2	6	0	4
k_Bacteria;p_Firmicutes;c_Negativicutes;o_Selenomonadales;f_Acidaminococcaceae;g_Phascolarctobacterium;s_Ruminococcus sp. N15.MGS-57;	0	0	0	0	0	0	0	0	0	0	0	0	0	0	0	0	0	0	0	0	0	0	0	0	0	0	0	0	0	0	0	0	0	0	0	0	0
k_Bacteria;p_Firmicutes;c_Negativicutes;o_Selenomonadales;f_Veillonellaceae;g_Dialister;;	0	0	0	0	0	0	0	0	0	0	0	0	0	0	0	0	0	0	0	0	0	0	0	0	0	0	0	0	0	0	0	0	0	0	0	0	0
k_Bacteria;p_Firmicutes;c_Negativicutes;o_Selenomonadales;f_Veillonellaceae;g_Dialister;s_uncultured bacterium;	0	0	0	0	0	0	0	0	0	0	0	0	0	0	0	0	0	0	0	0	0	0	0	0	0	0	0	0	0	0	0	0	0	0	0	0	0
k_Bacteria;p_Firmicutes;c_Negativicutes;o_Selenomonadales;f_Veillonellaceae;g_Dialister;s_unidentified;	0	0	0	0	0	0	0	0	0	0	0	0	0	0	0	0	0	0	0	0	0	0	0	0	0	0	0	0	0	0	0	0	0	0	0	0	0
k_Bacteria;p_Firmicutes;c_Negativicutes;o_Selenomonadales;f_Veillonellaceae;g_Megamonas;;	0	0	0	2	0	0	0	0	0	0	0	0	0	0	0	0	2	0	0	3	0	0	0	0	0	0	0	0	6	4	0	0	0	0	5	0	0
k_Bacteria;p_Firmicutes;c_Negativicutes;o_Selenomonadales;f_Veillonellaceae;g_Megamonas;s_Megamonas hypermegale;	0	0	0	0	0	0	0	0	0	0	0	0	0	0	0	0	0	0	0	0	0	0	0	0	0	5	0	3	0	0	0	0	0	0	0	0	0
k_Bacteria;p_Firmicutes;c_Negativicutes;o_Selenomonadales;f_Veillonellaceae;g_Megamonas;s_uncultured bacterium;	0	0	0	0	0	2	0	0	0	0	0	0	0	0	0	0	0	0	0	0	0	0	0	0	0	0	0	0	0	0	0	0	0	0	0	0	0
k_Bacteria;p_Firmicutes;c_Negativicutes;o_Selenomonadales;f_Veillonellaceae;g_Megamonas;s_uncultured organism;	0	0	0	0	0	0	0	0	0	0	0	0	0	0	0	0	0	0	0	0	0	0	0	0	0	0	0	0	0	0	5	0	0	0	0	0	0
k_Bacteria;p_Firmicutes;c_Negativicutes;o_Selenomonadales;f_Veillonellaceae;g_Megamonas;s_unidentified;	0	0	0	0	0	0	0	0	5	0	0	0	0	0	0	0	0	0	0	0	0	0	0	0	0	0	0	0	0	0	0	0	0	0	0	0	0
k_Bacteria;p_Firmicutes;c_Negativicutes;o_Selenomonadales;f_Veillonellaceae;g_Megasphaera;;	0	0	0	0	0	0	0	0	0	0	0	0	0	0	0	0	2	0	0	0	0	0	0	0	0	0	7	0	0	0	0	0	0	0	0	0	0
k_Bacteria;p_Firmicutes;c_Negativicutes;o_Selenomonadales;f_Veillonellaceae;g_Megasphaera;s_Megasphaera elsdenii;	0	0	0	0	0	0	0	0	0	0	0	0	0	0	10	0	0	0	0	0	0	0	0	0	0	0	0	0	6	0	0	0	0	5	0	0	0
k_Bacteria;p_Firmicutes;c_Negativicutes;o_Selenomonadales;f_Veillonellaceae;g_Megasphaera;s_Megasphaera micronuciformis;	0	0	0	0	0	0	0	0	0	0	0	0	0	0	0	0	0	0	0	0	0	0	0	0	0	0	0	0	0	0	0	0	0	0	0	0	0
k_Bacteria;p_Firmicutes;c_Negativicutes;o_Selenomonadales;f_Veillonellaceae;g_Megasphaera;s_uncultured Ruminococcus sp.;	0	5	5	0	0	0	0	0	0	0	0	0	0	0	0	0	0	0	0	0	0	0	0	0	0	0	0	2	0	0	0	0	0	6	0	0	3
k_Bacteria;p_Firmicutes;c_Negativicutes;o_Selenomonadales;f_Veillonellaceae;g_Mitsuokella;s_uncultured bacterium;	0	0	0	0	0	0	0	0	0	0	0	0	0	0	0	0	0	0	0	0	0	0	0	0	0	0	0	0	0	0	0	0	0	0	0	0	0
k_Bacteria;p_Firmicutes;c_Negativicutes;o_Selenomonadales;f_Veillonellaceae;g_Selenomonas;s_uncultured rumen bacterium;	0	0	0	0	0	0	0	0	0	0	0	0	0	0	0	0	0	0	0	0	0	0	0	0	0	0	0	0	0	0	0	0	0	0	0	0	0
k_Bacteria;p_Firmicutes;c_Negativicutes;o_Selenomonadales;f_Veillonellaceae;g_Sporomusa;;	0	0	0	0	0	0	0	0	0	0	0	0	0	0	0	0	0	0	0	0	0	0	0	0	0	0	0	0	0	0	0	0	0	0	0	0	0
k_Bacteria;p_Firmicutes;c_Negativicutes;o_Selenomonadales;f_Veillonellaceae;g_Veillonella;;	0	0	0	0	0	0	0	0	0	4	0	0	0	0	0	0	0	0	0	0	0	0	0	0	0	0	0	0	0	0	0	0	0	0	0	0	0
k_Bacteria;p_Fusobacteria;c_Fusobacteriia;o_Fusobacteriales;f_Fusobacteriaceae;;;	0	0	0	0	0	0	0	0	0	0	0	0	0	0	0	0	0	0	0	0	0	0	0	0	0	0	0	0	0	0	0	0	0	0	3	0	0
k_Bacteria;p_Fusobacteria;c_Fusobacteriia;o_Fusobacteriales;f_Fusobacteriaceae;g_Cetobacterium;;	0	0	0	0	0	0	0	0	0	0	0	0	0	0	0	0	0	0	0	0	0	0	0	0	0	0	0	0	0	0	0	0	0	0	0	0	0
k_Bacteria;p_Fusobacteria;c_Fusobacteriia;o_Fusobacteriales;f_Fusobacteriaceae;g_Cetobacterium;s_Oryzias latipes ;	0	0	0	0	0	0	0	0	0	0	0	0	0	0	0	0	0	0	0	0	0	0	0	0	0	0	0	0	0	0	0	0	0	0	0	0	0
k_Bacteria;p_Fusobacteria;c_Fusobacteriia;o_Fusobacteriales;f_Fusobacteriaceae;g_Cetobacterium;s_uncultured bacterium;	806	1491	1033	1938	364	1052	1367	488	794	862	757	1036	1820	595	1584	1043	2135	445	786	763	809	1635	1718	2500	1535	2214	2097	2116	4017	2525	2287	1945	1468	2876	3836	1341	1718
k_Bacteria;p_Fusobacteria;c_Fusobacteriia;o_Fusobacteriales;f_Fusobacteriaceae;g_Fusobacterium;;	0	0	0	0	0	0	0	0	0	0	0	0	0	0	0	0	0	0	0	0	0	0	0	0	0	0	2	0	0	0	0	0	0	0	0	0	0
k_Bacteria;p_Fusobacteria;c_Fusobacteriia;o_Fusobacteriales;f_Fusobacteriaceae;g_Propionigenium;s_uncultured Propionigenium sp.;	0	0	0	0	0	0	0	0	0	0	0	0	0	0	0	0	0	0	0	0	0	0	0	0	3	0	0	0	3	0	0	0	0	0	0	0	0
k_Bacteria;p_Gemmatimonadetes;c_Gemmatimonadetes;o_Gemmatimonadales;f_Gemmatimonadaceae;;;	0	0	0	0	0	0	0	0	0	0	0	0	0	0	0	0	0	0	0	0	0	0	0	0	0	0	0	0	0	0	0	0	0	2	0	0	0
k_Bacteria;p_Lentisphaerae;c_Lentisphaeria;o_Victivallales;f_Victivallaceae;g_Victivallis;s_uncultured bacterium;	0	0	0	0	0	0	0	0	0	0	0	0	0	0	0	0	0	0	0	0	0	0	0	0	0	0	0	0	0	0	0	0	0	0	0	0	0
k_Bacteria;p_Lentisphaerae;c_Oligosphaeria;o_P.palmC41;f_uncultured bacterium;g_uncultured bacterium;s_uncultured bacterium;	0	0	0	0	0	0	0	0	0	0	0	0	0	0	0	0	0	0	0	0	0	0	0	0	0	0	0	0	0	0	0	0	0	0	0	0	0
k_Bacteria;p_Marinimicrobia ;;;;;;	0	0	0	0	0	0	0	0	0	0	0	0	0	0	0	0	0	0	0	0	0	0	0	0	0	0	0	2	0	0	0	0	0	0	0	0	0
k_Bacteria;p_Nitrospirae;c_Thermodesulfovibrionia;o_Thermodesulfovibrionales;f_Thermodesulfovibrionaceae;g_Thermodesulfovibrio;s_Thermodesulfovibrio thiophilus DSM 17215;	0	0	0	0	0	0	0	0	0	0	0	0	0	0	0	0	0	0	0	0	0	0	0	2	0	0	0	0	0	0	0	0	0	0	0	0	0
k_Bacteria;p_Omnitrophicaeota;;;;;;	0	2	0	0	0	0	0	0	0	0	0	0	0	0	0	0	0	0	0	0	0	0	0	3	0	0	0	0	0	0	0	0	0	0	0	0	0
k_Bacteria;p_Omnitrophicaeota;c_uncultured bacterium;o_uncultured bacterium;f_uncultured bacterium;g_uncultured bacterium;s_uncultured bacterium;	0	0	0	0	0	0	0	0	0	0	0	0	0	0	2	0	0	0	0	0	0	0	0	0	0	0	3	0	0	0	0	2	0	0	0	0	0
k_Bacteria;p_Patescibacteria;;;;;;	0	0	0	0	0	0	0	0	0	0	0	0	0	0	0	0	0	0	0	0	0	0	0	0	0	0	0	0	6	0	0	0	0	0	0	0	0
k_Bacteria;p_Patescibacteria;c_ABY1;;;;;	0	0	0	0	0	0	0	0	0	0	0	0	0	0	0	0	0	0	0	0	0	0	0	0	0	0	0	0	0	0	0	0	0	0	0	0	0
k_Bacteria;p_Patescibacteria;c_ABY1;o_Candidatus Kerfeldbacteria;f_uncultured bacterium;g_uncultured bacterium;s_uncultured bacterium;	0	0	0	0	0	0	0	0	0	0	0	0	0	0	0	0	0	0	0	0	0	0	0	0	0	0	0	0	0	3	0	0	4	0	3	0	0
k_Bacteria;p_Patescibacteria;c_ABY1;o_Candidatus Magasanikbacteria;;;;	0	0	0	0	0	0	0	0	0	0	0	0	0	0	0	0	0	0	0	0	0	0	0	0	0	0	0	0	0	0	0	0	0	0	0	0	0
k_Bacteria;p_Patescibacteria;c_ABY1;o_Candidatus Magasanikbacteria;f_uncultured bacterium;g_uncultured bacterium;s_uncultured bacterium;	0	0	0	0	0	0	0	0	0	2	0	0	0	0	0	0	0	0	0	0	0	0	0	0	0	0	0	0	0	0	0	0	0	0	0	0	0
k_Bacteria;p_Patescibacteria;c_ABY1;o_Candidatus Uhrbacteria;f_Candidatus Uhrbacteria bacterium GW2011_GWF2_41_40;g_Candidatus Uhrbacteria bacterium GW2011_GWF2_41_40;s_Candidatus Uhrbacteria bacterium GW2011_GWF2_41_40;	0	0	0	0	0	0	0	0	0	0	0	0	0	0	0	0	0	0	0	0	0	0	0	0	0	0	0	0	0	0	0	0	0	0	0	0	0
k_Bacteria;p_Patescibacteria;c_Gracilibacteria;;;;;	0	0	0	0	0	0	0	0	0	0	0	0	0	0	0	0	0	0	0	0	0	4	0	0	0	0	3	0	0	0	0	0	0	0	0	0	0
k_Bacteria;p_Patescibacteria;c_Gracilibacteria;o_uncultured bacterium;f_uncultured bacterium;g_uncultured bacterium;s_uncultured bacterium;	0	0	0	0	0	0	0	0	0	0	0	0	0	0	0	0	0	0	0	0	0	0	0	0	0	0	0	0	0	0	0	0	0	0	0	0	0
k_Bacteria;p_Patescibacteria;c_Parcubacteria;;;;;	0	0	0	0	0	0	0	0	0	0	0	0	0	0	0	0	0	0	0	0	0	0	0	0	0	0	0	2	0	0	0	0	0	0	0	0	0
k_Bacteria;p_Patescibacteria;c_Parcubacteria;o_Candidatus Colwellbacteria;f_uncultured bacterium;g_uncultured bacterium;s_uncultured bacterium;	0	0	0	0	0	0	0	0	0	0	0	0	0	0	0	0	0	0	0	0	0	0	0	0	0	0	0	0	0	0	0	0	0	0	0	0	0
k_Bacteria;p_Patescibacteria;c_Parcubacteria;o_Candidatus Moranbacteria;f_uncultured anaerobic bacterium;g_uncultured anaerobic bacterium;s_uncultured anaerobic bacterium;	0	0	0	0	0	0	0	0	0	0	0	0	0	0	0	0	0	0	0	0	0	0	0	0	0	0	0	0	0	0	0	0	0	0	0	2	0
k_Bacteria;p_Patescibacteria;c_Parcubacteria;o_Candidatus Nomurabacteria;;;;	0	0	0	0	0	0	0	0	0	0	0	0	0	0	0	0	0	0	0	0	0	0	0	0	0	0	0	0	0	0	0	0	0	0	4	0	0
k_Bacteria;p_Patescibacteria;c_Parcubacteria;o_Candidatus Vogelbacteria;f_uncultured bacterium;g_uncultured bacterium;s_uncultured bacterium;	0	0	0	0	0	0	0	0	0	0	0	0	0	0	0	0	0	0	0	0	0	0	0	0	0	0	0	0	0	0	0	0	0	0	0	0	0
k_Bacteria;p_Patescibacteria;c_Parcubacteria;o_Candidatus Yanofskybacteria;f_metagenome;g_metagenome;s_metagenome;	0	0	0	0	0	0	0	0	0	0	0	0	0	0	0	0	0	0	0	0	0	0	0	0	0	0	0	0	3	0	0	0	0	0	0	0	0
k_Bacteria;p_Patescibacteria;c_Parcubacteria;o_uncultured bacterium;f_uncultured bacterium;g_uncultured bacterium;s_uncultured bacterium;	0	0	0	0	0	0	0	0	0	0	0	0	0	0	0	0	0	0	0	0	0	0	0	0	0	0	0	0	0	0	0	0	0	0	0	0	0
k_Bacteria;p_Patescibacteria;c_Saccharimonadia;o_Saccharimonadales;;;;	0	0	0	0	0	0	0	0	0	0	0	0	0	0	0	0	0	0	0	0	0	0	0	0	0	0	0	0	0	0	0	0	0	0	0	0	0
k_Bacteria;p_Patescibacteria;c_Saccharimonadia;o_Saccharimonadales;f_Saccharimonadaceae;g_Candidatus Saccharimonas;s_uncultured bacterium;	143	548	39	6	272	677	449	136	218	248	75	103	204	71	36	351	185	327	139	27	48	453	1263	0	28	235	69	407	308	881	448	825	801	1238	819	695	12
k_Bacteria;p_Patescibacteria;c_WS6 ;o_uncultured anaerobic bacterium;f_uncultured anaerobic bacterium;g_uncultured anaerobic bacterium;s_uncultured anaerobic bacterium;	0	0	0	0	0	0	0	0	0	0	0	0	0	0	4	0	0	0	0	0	0	0	0	0	0	0	0	0	0	0	0	0	0	0	0	0	0
k_Bacteria;p_Patescibacteria;c_WS6 ;o_uncultured bacterium;f_uncultured bacterium;g_uncultured bacterium;s_uncultured bacterium;	0	0	0	0	0	0	0	0	0	2	0	0	0	0	0	0	0	0	0	0	0	0	0	0	0	0	0	0	0	0	0	0	0	0	0	0	0
k_Bacteria;p_Planctomycetes;c_Phycisphaerae;o_Phycisphaerales;f_AKAU3564 sediment group;;;	0	0	0	0	0	0	0	0	0	0	0	0	0	0	0	0	0	0	0	0	0	0	0	0	0	0	0	0	0	0	0	0	0	0	0	0	0
k_Bacteria;p_Planctomycetes;c_Phycisphaerae;o_Phycisphaerales;f_AKAU3564 sediment group;g_uncultured planctomycete;s_uncultured planctomycete;	0	0	0	0	0	0	0	0	0	0	0	0	0	0	0	0	0	0	0	0	0	0	0	0	2	0	0	0	0	0	0	0	0	0	0	0	0
k_Bacteria;p_Planctomycetes;c_Phycisphaerae;o_Phycisphaerales;f_Phycisphaeraceae;g_CL500-3;s_uncultured bacterium;	0	0	0	0	0	0	0	0	0	0	0	0	0	0	0	0	0	0	0	0	0	0	0	0	0	0	0	0	0	0	0	0	0	0	0	0	0
k_Bacteria;p_Planctomycetes;c_Planctomycetacia;o_Gemmatales;f_Gemmataceae;g_uncultured;;	0	3	0	0	0	0	0	0	0	0	0	0	0	0	0	0	0	0	0	0	0	0	0	0	0	0	0	0	0	0	0	0	0	0	0	0	0
k_Bacteria;p_Planctomycetes;c_Planctomycetacia;o_Gemmatales;f_Gemmataceae;g_uncultured;s_uncultured bacterium;	0	0	0	0	0	0	0	0	0	0	0	0	0	0	0	0	0	0	0	0	0	0	0	0	0	0	0	0	0	0	0	0	0	0	0	0	0
k_Bacteria;p_Planctomycetes;c_Planctomycetacia;o_Pirellulales;f_Pirellulaceae;g_Pirellula;;	0	0	0	0	0	0	0	0	0	0	0	0	0	0	0	0	0	0	0	0	0	0	0	0	0	0	0	0	0	0	0	0	0	0	0	0	0
k_Bacteria;p_Planctomycetes;c_Planctomycetacia;o_Pirellulales;f_Pirellulaceae;g_uncultured;;	0	0	0	0	0	0	0	0	0	0	0	0	0	0	0	0	0	0	0	0	0	0	0	0	2	0	0	0	0	0	0	0	0	0	0	0	0
k_Bacteria;p_Proteobacteria;c_Alphaproteobacteria;;;;;	0	0	0	0	0	0	0	0	0	0	0	0	2	0	0	0	0	0	0	0	0	0	0	0	0	0	0	0	0	0	0	0	0	0	0	0	0
k_Bacteria;p_Proteobacteria;c_Alphaproteobacteria;o_Acetobacterales;f_Acetobacteraceae;;;	0	0	0	0	0	0	0	0	0	2	0	0	0	0	0	0	2	0	0	0	0	0	0	0	0	0	0	0	0	0	0	0	0	2	0	0	0
k_Bacteria;p_Proteobacteria;c_Alphaproteobacteria;o_Caulobacterales;f_Caulobacteraceae;g_Brevundimonas;;	0	0	0	0	0	0	0	0	0	0	0	0	0	0	0	0	0	0	0	0	0	0	4	0	0	0	0	0	0	0	0	0	0	0	0	0	0
k_Bacteria;p_Proteobacteria;c_Alphaproteobacteria;o_Micavibrionales;f_uncultured;g_uncultured bacterium;s_uncultured bacterium;	0	0	0	0	0	0	0	0	0	0	0	0	3	0	3	0	0	0	0	0	0	0	0	0	2	0	2	0	0	0	0	0	0	0	5	0	0
k_Bacteria;p_Proteobacteria;c_Alphaproteobacteria;o_Rhizobiales;f_Beijerinckiaceae;g_1174-901-12;s_uncultured bacterium;	0	0	0	0	0	0	0	0	0	0	0	0	0	0	0	0	0	0	0	0	0	0	0	0	0	0	0	0	0	0	0	0	0	0	0	0	0
k_Bacteria;p_Proteobacteria;c_Alphaproteobacteria;o_Rhizobiales;f_Beijerinckiaceae;g_Bosea;;	0	2	0	0	0	0	0	0	0	0	0	0	0	0	0	0	0	0	0	0	0	0	0	0	0	0	0	5	3	0	0	0	0	0	0	0	0
k_Bacteria;p_Proteobacteria;c_Alphaproteobacteria;o_Rhizobiales;f_Beijerinckiaceae;g_Methylobacterium;;	0	0	0	0	0	0	0	0	0	0	0	0	0	0	0	0	0	0	0	0	0	0	0	0	0	0	4	0	0	0	0	0	0	0	0	0	0
k_Bacteria;p_Proteobacteria;c_Alphaproteobacteria;o_Rhizobiales;f_D05-2;;;	0	0	0	0	0	0	0	0	0	0	0	0	0	0	0	0	0	0	0	0	0	0	9	0	0	0	0	0	0	0	0	0	0	0	0	0	0
k_Bacteria;p_Proteobacteria;c_Alphaproteobacteria;o_Rhizobiales;f_Methyloligellaceae;g_uncultured;;	0	0	0	0	0	0	0	0	0	0	0	0	0	0	0	0	0	0	0	0	0	0	0	0	0	0	0	2	0	0	0	0	0	0	0	0	0
k_Bacteria;p_Proteobacteria;c_Alphaproteobacteria;o_Rhizobiales;f_Rhizobiaceae;g_Allorhizobium-Neorhizobium-Pararhizobium-Rhizobium;;	0	0	0	0	0	0	0	0	0	0	0	0	0	0	0	0	0	0	0	0	0	0	0	0	0	0	0	0	0	0	0	0	0	0	0	0	0
k_Bacteria;p_Proteobacteria;c_Alphaproteobacteria;o_Rhizobiales;f_Rhizobiaceae;g_Mesorhizobium;;	0	0	0	0	0	0	0	0	0	0	0	0	0	0	0	0	0	0	0	0	0	0	0	0	0	0	0	0	0	0	0	0	0	2	0	0	0
k_Bacteria;p_Proteobacteria;c_Alphaproteobacteria;o_Rhizobiales;f_Rhizobiales Incertae Sedis;g_uncultured;;	0	0	0	4	0	0	0	0	0	0	0	5	3	0	0	4	2	0	0	0	0	0	4	0	0	0	0	6	6	5	0	2	4	0	6	0	7
k_Bacteria;p_Proteobacteria;c_Alphaproteobacteria;o_Rhizobiales;f_Rhizobiales Incertae Sedis;g_uncultured;s_metagenome;	0	0	0	0	0	0	0	0	0	0	0	0	0	0	0	0	0	0	0	0	0	0	0	0	0	0	0	0	0	0	0	0	0	0	0	0	0
k_Bacteria;p_Proteobacteria;c_Alphaproteobacteria;o_Rhizobiales;f_Xanthobacteraceae;g_Bradyrhizobium;;	0	0	0	0	0	0	0	0	0	0	0	0	0	0	0	0	0	0	0	0	0	0	0	0	0	0	0	0	0	2	0	0	0	0	0	0	0
k_Bacteria;p_Proteobacteria;c_Alphaproteobacteria;o_Rhodobacterales;f_Rhodobacteraceae;;;	0	4	3	0	3	5	3	0	0	4	2	0	4	0	9	0	10	0	4	0	0	0	0	5	10	9	0	4	14	15	6	8	0	7	10	0	0
k_Bacteria;p_Proteobacteria;c_Alphaproteobacteria;o_Rhodobacterales;f_Rhodobacteraceae;g_Gemmobacter;;	0	0	0	0	0	0	0	0	0	0	0	0	0	0	0	0	0	0	0	0	0	0	0	0	0	0	0	0	0	0	0	0	0	0	0	0	0
k_Bacteria;p_Proteobacteria;c_Alphaproteobacteria;o_Rhodobacterales;f_Rhodobacteraceae;g_Paracoccus;;	0	0	0	0	0	0	0	0	0	0	0	0	0	9	0	0	0	0	0	0	0	0	10	0	0	0	0	0	0	0	0	0	0	0	0	0	0
k_Bacteria;p_Proteobacteria;c_Alphaproteobacteria;o_Rhodospirillales;f_uncultured;;;	0	0	0	0	0	0	0	0	0	0	0	0	0	0	0	0	0	0	0	0	0	0	0	0	0	0	0	0	0	0	0	0	0	0	0	0	0
k_Bacteria;p_Proteobacteria;c_Alphaproteobacteria;o_Rhodospirillales;f_uncultured;g_Azospirillum sp. 47_25;s_Azospirillum sp. 47_25;	7	0	5	0	5	0	2	0	3	0	0	0	0	0	16	0	0	8	0	14	0	0	0	0	4	0	0	0	0	0	0	0	0	0	0	0	0
k_Bacteria;p_Proteobacteria;c_Alphaproteobacteria;o_Rhodospirillales;f_uncultured;g_gut metagenome;s_gut metagenome;	0	0	0	0	0	2	3	0	5	0	0	0	3	7	0	0	0	0	0	25	0	0	0	0	0	0	0	0	0	0	0	0	0	0	0	0	0
k_Bacteria;p_Proteobacteria;c_Alphaproteobacteria;o_Rhodospirillales;f_uncultured;g_uncultured bacterium;s_uncultured bacterium;	247	0	55	0	4	9	14	5	11	0	6	29	30	21	16	19	25	38	0	261	0	0	0	0	16	0	12	0	0	0	0	6	0	0	0	0	0
k_Bacteria;p_Proteobacteria;c_Alphaproteobacteria;o_Rickettsiales;f_Mitochondria;g_uncultured bacterium;s_uncultured bacterium;	0	2	0	0	0	0	0	0	2	0	0	0	0	0	0	4	3	0	0	0	0	0	0	0	0	2	0	3	9	0	0	0	0	0	0	0	0
k_Bacteria;p_Proteobacteria;c_Alphaproteobacteria;o_Sphingomonadales;f_Sphingomonadaceae;g_Novosphingobium;;	0	0	0	0	0	0	0	0	0	0	0	0	0	0	0	0	0	0	0	0	0	0	0	0	0	0	0	0	0	0	0	0	0	0	0	0	0
k_Bacteria;p_Proteobacteria;c_Alphaproteobacteria;o_Sphingomonadales;f_Sphingomonadaceae;g_Sphingomonas;;	0	0	0	0	0	0	2	0	0	0	0	0	0	0	0	0	0	0	0	0	0	0	0	0	0	0	0	0	0	0	0	0	0	0	0	0	0
k_Bacteria;p_Proteobacteria;c_Deltaproteobacteria;o_DTB120;f_uncultured delta proteobacterium;g_uncultured delta proteobacterium;s_uncultured delta proteobacterium;	0	0	0	0	0	0	0	0	0	0	0	0	0	0	0	0	0	0	0	0	0	0	0	0	0	0	0	0	0	0	0	0	0	0	0	0	0
k_Bacteria;p_Proteobacteria;c_Deltaproteobacteria;o_Deltaproteobacteria Incertae Sedis;f_Syntrophorhabdaceae;g_Syntrophorhabdus;s_uncultured Syntrophorhabdus sp.;	0	0	0	0	0	0	0	0	0	0	0	0	0	0	0	0	0	0	0	0	0	0	0	0	0	0	0	0	0	0	0	0	0	0	0	0	0
k_Bacteria;p_Proteobacteria;c_Deltaproteobacteria;o_Desulfobacterales;f_Desulfobacteraceae;;;	0	0	0	0	0	0	0	0	0	0	0	0	0	0	0	0	0	0	0	0	0	0	0	0	0	0	0	0	0	0	0	0	0	0	0	0	0
k_Bacteria;p_Proteobacteria;c_Deltaproteobacteria;o_Desulfobacterales;f_Desulfobacteraceae;g_Desulfocella;;	0	0	0	0	0	0	0	0	0	0	0	0	0	0	0	0	0	0	0	0	0	0	0	0	0	0	0	0	0	0	0	0	0	0	3	0	0
k_Bacteria;p_Proteobacteria;c_Deltaproteobacteria;o_Desulfobacterales;f_Desulfobacteraceae;g_Desulfocella;s_Desulfobotulus sp. BG14;	0	0	0	0	0	0	0	0	0	0	0	0	0	0	0	0	0	0	0	0	0	0	0	0	0	0	0	0	0	0	0	0	0	0	0	0	0
k_Bacteria;p_Proteobacteria;c_Deltaproteobacteria;o_Desulfobacterales;f_Desulfobulbaceae;g_Desulfofustis;s_uncultured bacterium;	0	0	0	0	0	0	0	0	0	0	0	0	0	0	0	0	3	0	0	0	0	0	0	0	0	0	0	0	0	0	0	0	0	0	0	0	0
k_Bacteria;p_Proteobacteria;c_Deltaproteobacteria;o_Desulfovibrionales;f_Desulfomicrobiaceae;g_Desulfomicrobium;;	0	3	0	0	0	0	0	0	0	0	0	0	0	0	0	0	0	0	0	0	0	0	0	0	0	0	0	0	0	0	0	0	0	0	0	0	0
k_Bacteria;p_Proteobacteria;c_Deltaproteobacteria;o_Desulfovibrionales;f_Desulfomicrobiaceae;g_Desulfomicrobium;s_uncultured bacterium;	0	0	0	0	0	0	0	0	0	0	0	0	0	0	0	0	0	0	0	0	0	0	0	0	0	0	0	0	0	0	0	0	0	0	0	0	0
k_Bacteria;p_Proteobacteria;c_Deltaproteobacteria;o_Desulfovibrionales;f_Desulfovibrionaceae;;;	0	0	0	0	0	0	0	0	0	0	0	0	0	0	0	0	0	0	0	0	0	0	0	0	0	0	0	0	0	0	0	0	0	0	0	0	0
k_Bacteria;p_Proteobacteria;c_Deltaproteobacteria;o_Desulfovibrionales;f_Desulfovibrionaceae;g_Bilophila;s_uncultured bacterium;	8	4	5	5	10	24	21	0	0	20	0	5	51	88	6	79	6	8	0	5	2	0	30	22	2	9	0	7	31	11	17	2	82	17	16	13	6
k_Bacteria;p_Proteobacteria;c_Deltaproteobacteria;o_Desulfovibrionales;f_Desulfovibrionaceae;g_Desulfovibrio;;	0	0	0	0	0	0	0	0	0	0	0	0	0	0	0	0	0	0	0	0	0	0	0	0	0	0	0	0	0	0	3	0	0	0	0	0	0
k_Bacteria;p_Proteobacteria;c_Deltaproteobacteria;o_Desulfovibrionales;f_Desulfovibrionaceae;g_Desulfovibrio;s_uncultured Desulfovibrionaceae bacterium;	0	2	0	0	0	0	0	0	0	0	0	0	0	0	0	0	0	0	0	0	0	0	0	0	0	0	0	0	0	0	0	0	0	0	0	0	0
k_Bacteria;p_Proteobacteria;c_Deltaproteobacteria;o_Desulfovibrionales;f_Desulfovibrionaceae;g_Desulfovibrio;s_uncultured bacterium;	0	0	0	0	0	0	0	0	0	0	0	0	0	0	0	0	0	0	0	0	0	0	0	0	0	0	0	0	0	0	0	0	0	0	0	0	0
k_Bacteria;p_Proteobacteria;c_Deltaproteobacteria;o_Desulfovibrionales;f_Desulfovibrionaceae;g_uncultured;s_uncultured Desulfovibrionales bacterium;	22	6	17	22	52	124	30	22	5	36	8	5	170	134	11	81	3	24	4	3	0	16	37	21	0	15	3	9	84	41	29	7	149	16	89	17	12
k_Bacteria;p_Proteobacteria;c_Deltaproteobacteria;o_Desulfovibrionales;f_Desulfovibrionaceae;g_uncultured;s_uncultured bacterium;	138	41	149	100	678	818	299	380	81	395	67	47	1606	985	176	455	244	300	39	73	68	216	393	172	96	190	106	171	507	306	207	66	511	474	547	180	186
k_Bacteria;p_Proteobacteria;c_Deltaproteobacteria;o_Desulfuromonadales;f_Desulfuromonadaceae;g_Desulfuromusa;;	0	0	0	0	0	0	0	0	0	0	0	0	0	0	0	0	0	0	0	0	0	0	0	0	0	0	0	0	0	0	0	0	0	0	0	0	0
k_Bacteria;p_Proteobacteria;c_Deltaproteobacteria;o_MBNT15;;;;	0	0	0	0	0	0	0	0	0	0	0	0	0	0	0	0	0	0	0	0	0	0	0	0	0	0	0	0	0	0	0	0	0	0	0	0	0
k_Bacteria;p_Proteobacteria;c_Deltaproteobacteria;o_Syntrophobacterales;f_Syntrophaceae;g_uncultured;s_uncultured Syntrophaceae bacterium;	0	0	0	0	0	0	0	0	0	0	0	0	0	0	0	0	0	0	0	0	0	0	0	0	0	0	0	0	0	0	0	0	0	0	0	0	0
k_Bacteria;p_Proteobacteria;c_Gammaproteobacteria;;;;;	6	0	0	0	0	0	0	0	0	0	721	0	0	0	0	0	0	0	0	0	0	0	0	0	0	0	0	0	0	0	0	0	0	0	0	0	0
k_Bacteria;p_Proteobacteria;c_Gammaproteobacteria;o_Aeromonadales;f_Aeromonadaceae;g_Aeromonas;;	0	0	0	4	0	0	0	0	0	0	0	0	0	0	0	0	11	0	0	5	0	0	0	0	0	6	0	0	0	4	0	4	4	5	6	0	3
k_Bacteria;p_Proteobacteria;c_Gammaproteobacteria;o_Aeromonadales;f_Aeromonadaceae;g_Aeromonas;s_bacterium SUTW 73;	3	0	4	0	0	6	0	0	0	0	4	5	10	3	5	0	7	7	0	0	0	13	0	11	0	12	18	13	0	0	10	8	0	0	19	8	5
k_Bacteria;p_Proteobacteria;c_Gammaproteobacteria;o_Aeromonadales;f_Succinivibrionaceae;g_Succinivibrio;;	0	0	0	0	0	0	0	0	0	0	0	0	0	0	0	0	0	0	0	0	0	0	0	0	0	0	0	0	0	0	0	0	0	0	0	0	0
k_Bacteria;p_Proteobacteria;c_Gammaproteobacteria;o_Betaproteobacteriales;f_Burkholderiaceae;;;	15	74	43	71	10	60	51	29	28	37	13	43	76	26	65	36	91	18	23	30	32	56	78	80	73	70	125	96	181	96	72	74	57	124	135	52	80
k_Bacteria;p_Proteobacteria;c_Gammaproteobacteria;o_Betaproteobacteriales;f_Burkholderiaceae;g_Alcaligenes;;	0	0	0	0	0	0	0	0	0	0	0	0	0	0	0	0	0	0	0	0	0	0	0	0	0	0	0	0	0	0	0	0	0	0	0	0	0
k_Bacteria;p_Proteobacteria;c_Gammaproteobacteria;o_Betaproteobacteriales;f_Burkholderiaceae;g_Derxia;s_uncultured Derxia sp.;	0	0	0	0	0	0	0	0	0	0	0	0	0	0	0	0	0	0	0	0	0	0	4	0	0	0	0	0	0	0	0	0	0	0	0	0	0
k_Bacteria;p_Proteobacteria;c_Gammaproteobacteria;o_Betaproteobacteriales;f_Burkholderiaceae;g_Parasutterella;;	0	0	0	0	0	0	0	0	0	0	0	0	0	0	0	0	0	0	0	0	0	0	0	0	0	0	0	0	0	0	0	0	0	0	0	0	0
k_Bacteria;p_Proteobacteria;c_Gammaproteobacteria;o_Betaproteobacteriales;f_Burkholderiaceae;g_Parasutterella;s_Parasutterella secunda;	0	0	0	0	0	0	0	0	0	0	0	0	0	0	0	0	0	0	0	0	0	0	3	0	0	0	0	0	2	0	0	0	0	0	0	0	0
k_Bacteria;p_Proteobacteria;c_Gammaproteobacteria;o_Betaproteobacteriales;f_Burkholderiaceae;g_Parasutterella;s_uncultured bacterium;	407	245	102	2	4	114	14	322	189	25	170	287	76	76	446	3	206	61	95	418	66	303	0	32	576	92	471	145	5	2	55	338	26	0	19	19	11
k_Bacteria;p_Proteobacteria;c_Gammaproteobacteria;o_Betaproteobacteriales;f_Burkholderiaceae;g_Pelomonas;;	0	0	0	0	0	0	0	0	0	0	0	0	0	0	0	0	0	0	0	0	0	0	0	0	0	0	0	0	0	0	0	0	0	0	0	0	0
k_Bacteria;p_Proteobacteria;c_Gammaproteobacteria;o_Betaproteobacteriales;f_Burkholderiaceae;g_Sutterella;;	0	0	0	0	0	0	0	0	0	0	0	0	0	0	0	0	0	0	0	0	0	0	0	0	0	0	0	0	0	0	0	0	0	0	0	0	0
k_Bacteria;p_Proteobacteria;c_Gammaproteobacteria;o_Betaproteobacteriales;f_Burkholderiaceae;g_Sutterella;s_Burkholderia sp. K4410.MGS-135;	0	0	0	0	0	0	0	0	0	0	0	0	0	0	0	0	0	0	0	0	0	0	0	0	0	0	0	0	0	0	0	0	0	0	0	0	0
k_Bacteria;p_Proteobacteria;c_Gammaproteobacteria;o_Betaproteobacteriales;f_Burkholderiaceae;g_Sutterella;s_Sutturella timonensis;	0	0	0	0	0	0	0	0	0	0	0	0	0	0	0	0	0	0	0	0	0	2	0	0	0	0	0	0	0	0	0	0	0	0	0	0	0
k_Bacteria;p_Proteobacteria;c_Gammaproteobacteria;o_Betaproteobacteriales;f_Burkholderiaceae;g_Sutterella;s_gut metagenome;	0	0	0	0	0	0	0	0	0	0	0	0	0	0	0	0	0	0	0	0	0	0	0	0	0	0	0	0	0	0	0	0	0	0	0	0	0
k_Bacteria;p_Proteobacteria;c_Gammaproteobacteria;o_Betaproteobacteriales;f_Burkholderiaceae;g_Sutterella;s_uncultured bacterium;	0	0	0	0	0	0	0	0	0	0	0	0	0	0	0	0	0	0	0	0	0	0	0	0	0	0	0	0	0	0	0	0	0	2	0	0	0
k_Bacteria;p_Proteobacteria;c_Gammaproteobacteria;o_Betaproteobacteriales;f_Burkholderiaceae;g_uncultured;;	0	10	15	17	0	3	13	4	3	5	7	10	4	0	6	5	12	0	6	3	0	3	11	17	8	11	19	16	17	13	15	11	8	13	21	3	9
k_Bacteria;p_Proteobacteria;c_Gammaproteobacteria;o_Betaproteobacteriales;f_Chitinibacteraceae;g_Deefgea;s_Deefgea chitinilytica;	25	43	26	37	8	36	28	11	9	24	14	20	60	9	33	22	50	13	19	21	19	39	39	85	47	57	47	52	74	51	58	50	41	70	99	32	36
k_Bacteria;p_Proteobacteria;c_Gammaproteobacteria;o_Betaproteobacteriales;f_Chromobacteriaceae;g_Chromobacterium;;	0	0	0	0	0	0	0	0	0	0	0	0	0	0	3	0	0	0	0	0	0	0	0	0	0	3	0	0	0	0	0	0	0	0	0	0	0
k_Bacteria;p_Proteobacteria;c_Gammaproteobacteria;o_Betaproteobacteriales;f_Chromobacteriaceae;g_Crenobacter;;	0	0	0	0	0	0	0	0	0	0	0	0	0	0	0	0	0	0	0	0	0	0	0	0	0	0	0	0	0	0	0	0	0	0	0	0	0
k_Bacteria;p_Proteobacteria;c_Gammaproteobacteria;o_Betaproteobacteriales;f_Chromobacteriaceae;g_Crenobacter;s_uncultured bacterium;	0	3	12	8	0	8	0	0	8	0	0	5	10	0	0	0	7	6	5	7	0	0	7	9	0	8	7	13	16	9	10	0	8	6	5	0	7
k_Bacteria;p_Proteobacteria;c_Gammaproteobacteria;o_Betaproteobacteriales;f_Hydrogenophilaceae;g_Tepidiphilus;;	0	0	7	3	0	0	0	0	0	0	0	0	0	0	0	0	0	0	0	0	0	0	0	0	0	0	0	0	0	0	0	0	0	0	0	0	2
k_Bacteria;p_Proteobacteria;c_Gammaproteobacteria;o_Betaproteobacteriales;f_Hydrogenophilaceae;g_Tepidiphilus;s_uncultured bacterium;	0	0	0	0	0	5	3	0	0	0	0	0	0	0	0	0	0	0	0	0	0	0	0	0	0	0	2	2	7	0	0	0	2	0	0	0	0
k_Bacteria;p_Proteobacteria;c_Gammaproteobacteria;o_Betaproteobacteriales;f_Neisseriaceae;g_Neisseria;;	0	0	0	0	0	0	0	0	0	0	0	0	0	0	0	0	0	0	0	0	0	0	0	0	0	0	0	0	0	0	0	0	0	0	0	0	0
k_Bacteria;p_Proteobacteria;c_Gammaproteobacteria;o_Betaproteobacteriales;f_Rhodocyclaceae;;;	0	0	0	0	0	0	0	0	0	0	0	0	0	0	0	0	0	0	0	0	0	0	0	0	0	0	0	0	0	0	0	0	0	0	0	0	0
k_Bacteria;p_Proteobacteria;c_Gammaproteobacteria;o_Betaproteobacteriales;f_Rhodocyclaceae;g_Azospira;;	0	0	0	0	0	0	0	0	0	0	0	0	0	0	0	0	0	0	0	0	0	4	0	0	0	0	0	0	5	0	4	0	0	4	0	0	0
k_Bacteria;p_Proteobacteria;c_Gammaproteobacteria;o_Betaproteobacteriales;f_Rhodocyclaceae;g_Dechloromonas;;	21	53	39	78	12	43	50	18	22	23	23	45	46	20	44	44	75	14	25	10	29	47	68	88	60	75	70	70	155	78	88	49	42	104	125	51	82
k_Bacteria;p_Proteobacteria;c_Gammaproteobacteria;o_Betaproteobacteriales;f_Rhodocyclaceae;g_Dechloromonas;s_uncultured Rhodocyclaceae bacterium;	0	0	4	0	0	3	0	0	0	0	0	3	0	0	0	0	4	0	0	0	0	0	0	0	0	0	3	0	0	0	0	0	0	3	0	6	0
k_Bacteria;p_Proteobacteria;c_Gammaproteobacteria;o_Betaproteobacteriales;f_Rhodocyclaceae;g_Uliginosibacterium;s_bacterium 6RO2;	0	0	0	4	0	0	0	0	0	0	0	0	0	0	0	0	4	0	3	0	0	2	0	9	0	4	0	3	4	0	0	0	0	0	0	7	0
k_Bacteria;p_Proteobacteria;c_Gammaproteobacteria;o_Chromatiales;f_Chromatiaceae;;;	0	0	0	0	0	0	0	0	0	0	0	0	0	0	0	0	0	0	0	0	0	0	0	0	0	2	0	0	0	0	0	0	0	0	0	0	0
k_Bacteria;p_Proteobacteria;c_Gammaproteobacteria;o_Chromatiales;f_Chromatiaceae;g_Thiohalocapsa;s_Thiohalocapsa marina;	0	0	0	0	0	0	0	0	0	0	0	0	0	0	0	0	0	0	0	0	0	0	0	0	0	0	0	0	0	0	0	0	0	0	0	0	0
k_Bacteria;p_Proteobacteria;c_Gammaproteobacteria;o_Chromatiales;f_Chromatiaceae;g_Thiolamprovum;;	0	0	0	0	0	0	0	0	0	0	0	0	0	0	0	0	0	0	0	0	0	0	0	0	0	0	0	0	2	0	0	0	0	0	0	0	0
k_Bacteria;p_Proteobacteria;c_Gammaproteobacteria;o_Chromatiales;f_Chromatiaceae;g_Thiolamprovum;s_uncultured Chromatiaceae bacterium;	5	7	0	9	0	8	19	8	11	0	4	7	10	0	10	9	17	0	0	4	4	3	9	12	19	5	9	20	22	25	20	12	20	20	18	13	7
k_Bacteria;p_Proteobacteria;c_Gammaproteobacteria;o_Coxiellales;f_Coxiellaceae;g_Coxiella;s_uncultured bacterium;	0	0	0	0	0	2	0	0	0	0	0	0	0	0	0	0	0	0	0	0	0	0	0	0	0	0	0	0	0	0	0	0	0	0	0	0	0
k_Bacteria;p_Proteobacteria;c_Gammaproteobacteria;o_Enterobacteriales;f_Enterobacteriaceae;;;	0	0	0	0	0	0	0	0	0	0	0	0	0	0	5	0	0	0	0	0	0	0	0	0	0	5	5	0	0	0	0	0	3	5	0	0	0
k_Bacteria;p_Proteobacteria;c_Gammaproteobacteria;o_Enterobacteriales;f_Enterobacteriaceae;g_Escherichia-Shigella;;	6	0	39	0	5505	4	0	68	0	0	142	0	59	0	0	0	0	0	18	14	6	0	39	0	0	0	0	0	21	0	0	14	0	0	61	0	5
k_Bacteria;p_Proteobacteria;c_Gammaproteobacteria;o_Enterobacteriales;f_Enterobacteriaceae;g_Klebsiella;;	0	0	0	0	0	0	0	0	0	0	1000	0	0	6	0	0	0	0	0	0	0	8	0	0	0	0	0	0	0	0	0	0	0	0	0	0	0
k_Bacteria;p_Proteobacteria;c_Gammaproteobacteria;o_Enterobacteriales;f_Enterobacteriaceae;g_Plesiomonas;;	0	13	0	10	0	0	0	0	0	0	0	0	0	0	7	0	0	0	6	5	0	0	0	5	4	5	0	0	0	7	7	0	0	5	10	0	0
k_Bacteria;p_Proteobacteria;c_Gammaproteobacteria;o_Enterobacteriales;f_Enterobacteriaceae;g_Proteus;;	3	0	0	0	0	0	0	0	0	0	0	0	0	0	0	0	0	0	0	0	10	9	9	0	0	0	0	4	0	0	0	0	0	0	0	0	0
k_Bacteria;p_Proteobacteria;c_Gammaproteobacteria;o_Oceanospirillales;f_Nitrincolaceae;g_Marinobacterium;s_uncultured Marinobacterium sp.;	0	0	0	0	0	0	0	0	0	0	0	0	0	0	0	0	0	0	0	0	0	0	0	0	0	0	0	0	0	0	0	0	0	0	2	0	0
k_Bacteria;p_Proteobacteria;c_Gammaproteobacteria;o_Pasteurellales;f_Pasteurellaceae;g_Haemophilus;;	0	0	0	0	0	0	0	0	0	0	0	0	0	0	0	0	0	0	0	0	0	0	0	0	0	4	0	0	0	0	0	0	0	0	0	0	0
k_Bacteria;p_Proteobacteria;c_Gammaproteobacteria;o_Pseudomonadales;f_Moraxellaceae;g_Acinetobacter;;	0	0	2	0	0	0	0	0	0	0	0	0	0	0	0	0	0	0	0	0	0	0	0	0	0	0	0	0	0	0	0	0	0	0	0	0	0
k_Bacteria;p_Proteobacteria;c_Gammaproteobacteria;o_Pseudomonadales;f_Moraxellaceae;g_Enhydrobacter;;	0	0	0	0	0	0	0	0	0	0	0	0	0	0	0	0	0	0	0	0	0	0	0	0	0	0	0	0	0	0	0	0	0	0	0	0	0
k_Bacteria;p_Proteobacteria;c_Gammaproteobacteria;o_Pseudomonadales;f_Pseudomonadaceae;g_Pseudomonas;;	0	0	3	4	0	3	0	0	0	0	0	0	0	0	3	0	0	0	0	0	0	0	0	3	0	4	2	0	4	4	0	0	0	0	0	2	0
k_Bacteria;p_Proteobacteria;c_Gammaproteobacteria;o_Salinisphaerales;f_Solimonadaceae;g_Solimonas;;	0	0	0	0	0	0	0	0	0	0	0	0	0	0	0	0	0	0	0	0	0	0	0	0	0	0	0	0	0	0	0	0	0	0	0	0	3
k_Bacteria;p_Proteobacteria;c_Gammaproteobacteria;o_Steroidobacterales;f_Steroidobacteraceae;g_uncultured;;	0	0	0	0	0	0	0	0	0	0	0	0	0	0	0	0	0	0	0	0	0	0	0	0	0	0	0	0	0	0	0	0	0	0	0	0	0
k_Bacteria;p_Proteobacteria;c_Gammaproteobacteria;o_Xanthomonadales;f_Rhodanobacteraceae;g_Rhodanobacter;;	0	0	0	0	0	0	0	0	0	0	0	0	0	0	0	0	0	0	0	0	0	0	0	0	0	0	0	0	0	0	0	0	0	0	0	0	0
k_Bacteria;p_Proteobacteria;c_Gammaproteobacteria;o_Xanthomonadales;f_Xanthomonadaceae;g_Xanthomonas;;	0	0	0	0	0	0	0	0	0	0	0	0	0	0	0	0	0	0	0	0	0	0	0	0	0	0	0	0	0	0	0	0	0	0	0	0	0
k_Bacteria;p_Spirochaetes;c_MVP-15;o_uncultured bacterium;f_uncultured bacterium;g_uncultured bacterium;s_uncultured bacterium;	0	0	0	0	0	0	0	0	0	0	0	0	0	0	0	0	0	0	0	0	0	0	0	0	0	0	0	0	0	0	0	0	0	0	0	0	0
k_Bacteria;p_Spirochaetes;c_Spirochaetia;o_Spirochaetales;f_Spirochaetaceae;;;	0	0	0	0	0	0	0	0	0	0	0	0	0	0	0	0	0	0	0	0	0	0	0	0	0	0	0	0	0	0	0	0	0	0	0	2	0
k_Bacteria;p_Spirochaetes;c_Spirochaetia;o_Spirochaetales;f_Spirochaetaceae;g_uncultured;;	0	0	0	0	0	0	0	0	0	0	0	0	0	0	0	0	0	0	0	0	0	0	0	0	0	0	0	0	0	0	0	0	0	0	0	0	0
k_Bacteria;p_Spirochaetes;c_Spirochaetia;o_Spirochaetales;f_Spirochaetaceae;g_uncultured;s_uncultured bacterium SJA-102;	0	0	0	0	0	0	0	0	0	0	0	0	0	0	0	0	0	0	0	0	0	0	0	0	0	0	0	0	0	0	0	0	0	0	0	0	0
k_Bacteria;p_Spirochaetes;c_Spirochaetia;o_Spirochaetales;f_Spirochaetaceae;g_uncultured;s_uncultured bacterium;	0	0	0	0	0	0	0	0	0	0	0	0	0	0	0	0	0	0	0	0	0	0	0	0	0	0	0	0	0	0	0	0	0	0	0	0	0
k_Bacteria;p_Synergistetes;c_Synergistia;o_Synergistales;f_Synergistaceae;g_Dethiosulfovibrio;s_Dethiosulfovibrio salsuginis;	0	0	0	4	0	0	0	0	0	0	0	0	0	0	0	0	0	0	0	0	0	0	0	2	0	0	11	6	8	6	5	6	0	8	4	0	0
k_Bacteria;p_Synergistetes;c_Synergistia;o_Synergistales;f_Synergistaceae;g_Synergistes;s_uncultured organism;	0	0	0	0	0	0	0	0	0	0	0	0	0	0	0	0	0	0	0	0	0	0	0	4	0	0	0	0	0	2	0	0	0	0	0	0	0
k_Bacteria;p_Tenericutes;c_Mollicutes;o_Anaeroplasmatales;f_Anaeroplasmataceae;g_Anaeroplasma;;	0	0	0	0	0	0	0	0	0	0	0	0	0	0	0	0	0	0	0	0	0	0	0	0	0	0	0	0	0	0	0	0	0	0	0	0	0
k_Bacteria;p_Tenericutes;c_Mollicutes;o_Anaeroplasmatales;f_Anaeroplasmataceae;g_Anaeroplasma;s_uncultured bacterium;	43	125	77	59	86	6	36	5	5	96	68	0	167	184	5	3	9	160	25	24	178	83	0	40	243	0	129	11	27	0	0	116	0	19	107	0	201
k_Bacteria;p_Tenericutes;c_Mollicutes;o_Izimaplasmatales;f_gut metagenome;g_gut metagenome;s_gut metagenome;	0	0	0	0	0	0	0	0	0	0	0	0	0	0	0	0	0	0	0	0	0	0	0	0	0	0	0	0	0	0	0	0	0	0	0	0	0
k_Bacteria;p_Tenericutes;c_Mollicutes;o_Mollicutes RF39;;;;	0	7	0	0	0	4	14	2	2	0	6	0	0	0	0	0	0	0	0	3	7	7	8	0	0	5	0	0	27	5	0	11	0	0	5	0	0
k_Bacteria;p_Tenericutes;c_Mollicutes;o_Mollicutes RF39;f_uncultured Lachnospiraceae bacterium;g_uncultured Lachnospiraceae bacterium;s_uncultured Lachnospiraceae bacterium;	0	0	0	0	0	0	0	0	0	0	0	0	0	0	0	0	0	0	0	0	0	0	0	0	0	0	0	0	0	0	0	3	0	0	0	0	0
k_Bacteria;p_Tenericutes;c_Mollicutes;o_Mollicutes RF39;f_uncultured bacterium;g_uncultured bacterium;s_uncultured bacterium;	0	52	0	0	0	0	27	0	0	5	0	0	0	0	4	0	0	0	0	5	0	2	0	0	0	6	4	5	0	10	0	11	0	0	5	0	9
k_Bacteria;p_Tenericutes;c_Mollicutes;o_Mollicutes RF39;f_unidentified;g_unidentified;s_unidentified;	0	0	0	0	0	0	0	0	0	0	0	0	0	0	0	0	0	0	0	0	0	0	0	0	0	0	0	0	0	0	0	0	0	4	0	0	0
k_Bacteria;p_Tenericutes;c_Mollicutes;o_Mycoplasmatales;f_Mycoplasmataceae;g_Ureaplasma;;	0	0	0	0	0	0	0	0	0	0	0	0	0	0	0	0	0	0	0	0	0	0	0	0	0	0	0	0	0	0	0	0	0	0	0	0	0
k_Bacteria;p_Tenericutes;c_Mollicutes;o_Mycoplasmatales;f_Mycoplasmataceae;g_uncultured;s_uncultured Firmicutes bacterium;	0	0	0	0	0	0	0	0	0	0	0	0	0	0	0	0	0	0	0	0	0	0	0	0	0	0	0	0	0	0	0	0	0	0	0	0	0
k_Bacteria;p_Verrucomicrobia;c_Verrucomicrobiae;o_Pedosphaerales;f_Pedosphaeraceae;g_uncultured Desulfovibrio sp.;s_uncultured Desulfovibrio sp.;	0	0	0	0	0	0	0	0	0	0	0	0	0	0	0	0	0	0	0	0	0	0	3	0	0	0	0	0	0	0	0	0	0	0	0	0	0
k_Bacteria;p_Verrucomicrobia;c_Verrucomicrobiae;o_Pedosphaerales;f_Pedosphaeraceae;g_uncultured bacterium;s_uncultured bacterium;	0	0	0	0	0	0	0	0	0	0	0	0	0	0	0	0	0	0	0	0	0	0	0	0	0	0	0	0	0	0	0	0	0	0	0	0	0
k_Bacteria;p_Verrucomicrobia;c_Verrucomicrobiae;o_Verrucomicrobiales;f_Akkermansiaceae;g_Akkermansia;;	0	0	0	0	0	0	0	0	4	0	0	0	2	0	0	3	4	0	0	0	0	0	0	3	0	3	0	0	0	0	0	0	0	0	6	0	7
k_Bacteria;p_Verrucomicrobia;c_Verrucomicrobiae;o_Verrucomicrobiales;f_Akkermansiaceae;g_Akkermansia;s_uncultured bacterium;	0	0	0	0	0	15	0	38	0	0	0	0	0	0	33	0	0	0	0	0	0	3	0	0	0	0	2	7	0	2	0	0	0	0	0	0	0
k_Bacteria;p_Verrucomicrobia;c_Verrucomicrobiae;o_Verrucomicrobiales;f_Rubritaleaceae;g_Luteolibacter;;	0	3	2	3	0	0	0	0	0	0	0	0	0	0	3	0	3	0	0	0	0	0	0	2	0	0	5	0	0	4	0	0	3	0	0	0	0
k_Bacteria;p_WPS-2;c_uncultured rumen bacterium;o_uncultured rumen bacterium;f_uncultured rumen bacterium;g_uncultured rumen bacterium;s_uncultured rumen bacterium;	0	0	0	0	0	0	0	0	0	0	0	0	0	0	0	0	0	0	0	0	0	0	0	0	0	0	0	0	0	0	0	0	0	0	0	0	0
Y-Cotrol, young control mice; Y-TWK10, young mice administered TWK10; A-Control, aged control mice; A-TWK10, aged mice administered TWK10.
